# Supplementary material
Source: Research Square preprint supplement (doi:10.21203/rs.3.rs-9526545/v1)
Supplement: Supplementary file 1 [file aad697b101f937ef59590989.docx]

**Supplementary material**

**Soil microalga-derived L-glutamic acid enhances the growth and yield of pepper by recruiting nitrogen-fixing bacteria**

Cong Liu1,2,#, Hongqing Wei1,#, Yuwei Xing1, Zhonghua Shen1,3, Jie Cao3, Jun Wang1,*

1Colleges of Marine Life Sciences, Ocean University of China, 5 Yushan Road, Qingdao, 266003, Shandong Province, China.

2Weifang Ocean University of Science and Technology, Weifang, 261108, Shandong Province, China.

3Shandong Zhengyuan Environmental Technology Co., Ltd., Jinan, 250014, Shandong, China.

#C. Liu and H. Wei contributed equally to this work.

*Co-corresponding author

E-mail address: wangjun@ouc.edu.cn (J. Wang).

Total Number of Pages: 38

Total Number of Tables: 15

otal Number of Figures: 17

Tab. S1 Common microalgae in soil

| Chlorophyta | Chlorophyceae | Chlorococcales | Chlorellaceae | *Chlorella* |
| --- | --- | --- | --- | --- |
| *Ankistrodesmus* |
| *Conenoooccus* |
| Chlorococcaceae | *Chlorococcum* |
| Scenedesmaceae | *Scenedesmus* |
| Characiaceae | *Characium* |
| Oocystaceae | *Gloeocystis* |
| Ulotrichales | Ulotrichaceae | *Klebsormidium* |
| *Stichococcus* |
| *Raphidonema* |
| *Ulothrix* |
| *Geminella* |
| *Binuclcaria* |
| Microsporaceae | *Microspora* |
| Cylindrocapsaceae | *Cylindrocapsa* |
| Volvocales | Volvocaceae | *Volvox* |
| *Pandorina* |
| Chlamydomonadaceae | *Chlamydomonas* |
| Tetrasporales | Palmellaceae | *Asterococcus* |
| Cladophorales | Cladophoraceae | *Claclophora* |
| Zygnematophyceae | Desmidiales | Desmidiaceae | *Gonalozygon* |
| *Penium* |
| Zygnematales | Zygnemataceae | *Zygnema* |
| *Zygogonium* |
| Mesotaeniaceae | *Cylindrocystis* |
| Cyanophyta | Cyanophyceae | Osillatoriales | Oscillatoriaceae | *Plectonema* |
| *Oscillatoria* |
| *Lyngbya* |
| Phormidiaceae | *Phormidium* |
| *Microcolus* |
| Pseudanabaenaceae | *Planktolyngbya* |
| Nostocales | Nostocaceae | *Anabaenopsis* |
| *Nostoc* |
| *Anabaena* |
| *Cylindrospermum* |
| *Aulosira* |
| *Anabaenopsis* |
| Scytonemataceae | *Scytonema* |
| Microchaetaceae | *Tolypothrix* |
| Rivulariaceae | *Calothrix* |
| Chroococcales | Chroococcaceae | *Microcystis* |
| *Asterocapsa* |
| *Chroococcus* |
| Merismopediaceae | *Gomphosphaeria* |
| *Aphanocapsa* |
| *Coelosphaerium* |
| *Synechocystis* |
| Microcystaceae | *Eucapsis* |
| *Gloeocapsa* |
| Chamaesiphonaceae | *Stichosiphon* |
| Synechococcaceae | *Cyanothece* |
| Stigonematales | Stigonemataceae | *Stigonema* |
| Fischerellaceae | *Fischerella* |
| Gomontiellales | Chamaesiphonaceae | *Chamaesiphon* |
| Bacillariophyta | pennates | Naviculales | Naviculaceae | *Frustulia* |
| *Pinnularia* |
| *Stauroneis* |
| *Navicula* |
| Araphidiales | Fragilariaceae | *Fragilaria* |
| *Synedra* |
| *Tabellaria* |
| *Diatuma* |
| *Meribion* |
| *Ceratoneis* |
| Cymbellaceae | *Amphora* |
| *Cymbella* |
| Surirellales | Nitzschiaceae | *Nitzschia* |
| *Hantzschia* |
| Monoraphidinales | Achnanthaceae | *Achnanthes* |
| Centricae | Coscinodiscales | Coscinodiscaceae | *Melosira* |
| *Cycloiella* |
| Pyrrophyta | Dinophyceae | Peridiniales | Ceratiaceae | *Ceratium* |
| Gymnodiniaceae | Glenodinium |
| *Gymnodinium* |
| Peridineaceae | *Peridinium* |
| Xanthophyta | Xanthophyceae | Tribonematales | Tribonemataceae | *Heterotrichales* |
| Xanthophyceae | Vaucheriales | Vaucheriaceae | *Vaucheria* |
| Ochrophyta | Chrysophyceae | Ochromonadales | Chromulinaceae | *Chromulina* |
| Euglenophyta | Euglenoidea | Euglenales | Euglenaceae | *Euglena* |
| Rhodophyta | Porphyridiophyceae | Porphyridiales | Porphyridiaceae | *Porphyridium* |

Tab. S2 BG11 medium components

| Reagent | Concentration (g/L) | Reagent | Concentration (g/L) |
| --- | --- | --- | --- |
| NaNO3 | 1.5 | H3BO3 | 2.86 |
| MgSO4﹒7H2O | 0.075 | MnCl2﹒4H2O | 1.86 |
| K2HPO4 | 0.04 | ZnSO4﹒7H2O | 0.22 |
| Citric Acid | 0.006 | CuSO4﹒5H2O | 0.08 |
| CaCl2﹒2H2O | 0.036 | Co(NO3)2﹒6H2O | 0.05 |
| EDTA﹒2Na | 0.001 | Na2MoO4﹒2H2O | 0.39 |
| Na2CO3 | 0.02 |  |  |
| Ammonium ferric citrate | 0.006 |  |  |

The pH of the BG11 liquid medium was adjusted to 7.1, and it was used after autoclaving at 121°C for 30 minutes. The preparation method for BG11 solid medium was as follows: 1.5%‒2.0% agar was added to the BG11 liquid medium with a pH of 7.1, and it was autoclaved at 121°C for 30 min.

Tab. S3 Total N, P, K content in microalgae

| Microalgae | Total N content (mg/kg) | Total P content (mg/kg) | Total Kcontent (mg/kg) |
| --- | --- | --- | --- |
| *Scenedesmus* sp | 1.31×104 | 1.78×103 | 1025 |
| *Anabaena azotica* | 1.39×103 | 94 | 33 |

Tab. S4 Experimental soil properties

| Uncultivated soil properties | Content | Cultivated soil properties | Content |
| --- | --- | --- | --- |
| pH | 5.85±0.03 | pH | 5.70±0.03 |
| Organic matter (g/kg) | 48.33±0.86 | Organic matter (g/kg) | 35.99±0.86 |
| Available nitrogen (mg/kg) | 85.02±1.32 | Available nitrogen (mg/kg) | 120.23±1.32 |
| Available phosphorus (mg/kg) | 12.63±0.19 | Available phosphorus (mg/kg) | 74.05±11.59 |
| Available potassium (mg/kg) | 33.33±2.93 | Available potassium (mg/kg) | 101.00±2.93 |
| Total P (g/kg) | 0.25±0.001 | Total P (g/kg) | 0.80±0.002 |
| Total K (g/kg) | 20.32±3.79 | Total K (g/kg) | 22.4±1.26 |
| Total N (g/kg) | 2.01±0.04 | Total N (g/kg) | 2.11±0.04 |

Tab. S5 Nitrogen-fixing Ashby's medium components

| Reagent | Concentration (g/L) |
| --- | --- |
| K2HPO4 | 0..2 |
| MgSO4 | 0.2 |
| NaCl2 | 0.2 |
| CaCO3 | 5.0 |
| Mannitol | 10.0 |
| CaSO4 | 0.1 |
| Agar | 15.0 |

Nitrogen-fixing Ashby's medium should be used after autoclaving (121°C, 30 minutes).

Tab. S6 YMA medium components

| Reagent | Concentration (g/L) |
| --- | --- |
| Mannitol | 10 |
| Yeast extract | 0.3 |
| K2HPO4 | 0.2 |
| MgSO4﹒7H2O | 0.2 |
| NaCl | 0.05 |

The pH of the YMA liquid medium was adjusted to 7.1, and it was used after autoclaving at 121°C for 30 minutes. The preparation method for YMA solid medium was as follows: 1.5%-2.0% agar was added to the YMA liquid medium with a pH of 7.1, and it was autoclaved at 121°C for 30 min.

Tab. S7 R2A medium components

| Reagent | Concentration (g/L) |
| --- | --- |
| Trypton | 0.5 |
| Yeast Extract | 0.3 |
| Casein acids Hydrolysate | 0.5 |
| Glucose | 0.5 |
| Starch from Potato Soluble | 0.5 |
| K2HPO4 | 0.3 |
| MgSO4﹒7H2O | 0.05 |
| Pyruvic acid sodium salt | 0.3 |

The pH of the R2A liquid medium was adjusted to 7.1, and it was used after autoclaving at 121°C for 30 minutes. The preparation method for R2A solid medium was as follows: 1.5%‒2.0% agar was added to the R2A liquid medium with a pH of 7.1, and it was autoclaved at 121°C for 30 min.

Tab. S8 LB medium components

| Reagent | Concentration (g/L) |
| --- | --- |
| Trypton | 10 |
| Yeast Extract | 5 |
| NaCl | 10 |

The pH of the LB liquid medium was adjusted to 7.1, and it was used after autoclaving at 121°C for 30 minutes. The preparation method for LB solid medium was as follows: 1.5%‒2.0% agar was added to the LB liquid medium with a pH of 7.1, and it was autoclaved at 121°C for 30 min.

Tab. S9. Different treatments of BG11, microalgae extracellular polymeric substances (EPS), and microalgae filtrate addition amounts

| Treatment | Bacteria | The volume of bacterial culture with OD600 = 0.1-0.3 (mL) | The volume of BG11 (mL) | The volume of *Anabaena azotica* filtrate (mL) | The volume of *Anabaena azotica* EPS (mL) | The volume of *Scenedesmus* sp. filtrate (mL) | The volume of *Scenedesmus* sp. EPS (mL) |
| --- | --- | --- | --- | --- | --- | --- | --- |
| B | *Bradyrhizobium japonicum* | 200 | 0 | 0 | 0 | 0 | 0 |
| BB | *Bradyrhizobium japonicum* | 200 | 2 | 0 | 0 | 0 | 0 |
| BAF | *Bradyrhizobium japonicum* | 200 | 0 | 2 | 0 | 0 | 0 |
| BAE | *Bradyrhizobium japonicum* | 200 | 0 | 0 | 2 | 0 | 0 |
| BSF | *Bradyrhizobium japonicum* | 200 | 0 | 0 | 0 | 2 | 0 |
| BSE | *Bradyrhizobium japonicum* | 200 | 0 | 0 | 0 | 0 | 2 |
| BASF | *Bradyrhizobium japonicum* | 200 | 0 | 1 | 0 | 1 | 0 |
| BASE | *Bradyrhizobium japonicum* | 200 | 0 | 0 | 1 | 0 | 1 |
| M | *Methylobacterium* sp. | 200 | 0 | 0 | 0 | 0 | 0 |
| MB | *Methylobacterium* sp. | 200 | 2 | 0 | 0 | 0 | 0 |
| MAF | *Methylobacterium* sp. | 200 | 0 | 2 | 0 | 0 | 0 |
| MAE | *Methylobacterium* sp. | 200 | 0 | 0 | 2 | 0 | 0 |
| MSF | *Methylobacterium* sp. | 200 | 0 | 0 | 0 | 2 | 0 |
| MSE | *Methylobacterium* sp. | 200 | 0 | 0 | 0 | 0 | 2 |
| MASF | *Methylobacterium* sp. | 200 | 0 | 1 | 0 | 1 | 0 |
| MASE | *Methylobacterium* sp. | 200 | 0 | 0 | 1 | 0 | 1 |
| S | *Sphingomonas* sp. | 200 | 0 | 0 | 0 | 0 | 0 |
| SB | *Sphingomonas* sp. | 200 | 2 | 0 | 0 | 0 | 0 |
| SAF | *Sphingomonas* sp. | 200 | 0 | 2 | 0 | 0 | 0 |
| SAE | *Sphingomonas* sp. | 200 | 0 | 0 | 2 | 0 | 0 |
| SSF | *Sphingomonas* sp. | 200 | 0 | 0 | 0 | 2 | 0 |
| SSE | *Sphingomonas* sp. | 200 | 0 | 0 | 0 | 0 | 2 |
| SASF | *Sphingomonas* sp. | 200 | 0 | 1 | 0 | 1 | 0 |
| SASE | *Sphingomonas* sp. | 200 | 0 | 0 | 1 | 0 | 1 |

Tab. S10. The addition amounts of L-Glutamic acid (LGA), 2,5-Anhydro-1-deoxy-1-[(1-hydroxy-2-butanyl)amino]-D-mannitol (DM), and V-Pyrro/NO (VP) under different treatments

| Treatment | Bacteria | Medium | LGA (μg/L) | DM (μg/L) | VP (μg/L) |
| --- | --- | --- | --- | --- | --- |
| M | *Methylobacterium* sp. | R2A | 0 | 0 | 0 |
| ML | *Methylobacterium* sp*.* | R2A | 4.8 | 0 | 0 |
| MD | *Methylobacterium* sp. | R2A | 0 | 4.1 | 0 |
| MV | *Methylobacterium* sp. | R2A | 0 | 0 | 8.4 |
| S | *Sphingomonas* sp. | LB | 0 | 0 | 0 |
| SL | *Sphingomonas* sp. | LB | 4.8 | 0 | 0 |
| SD | *Sphingomonas* sp. | LB | 0 | 4.1 | 0 |
| SV | *Sphingomonas* sp. | LB | 0 | 0 | 8.4 |
| B | *Bradyrhizobium japonicum* | YMA | 0 | 0 | 0 |
| BL | *Bradyrhizobium japonicum* | YMA | 4.8 | 0 | 0 |
| BD | *Bradyrhizobium japonicum* | YMA | 0 | 4.1 | 0 |
| BV | *Bradyrhizobium japonicum* | YMA | 0 | 0 | 8.4 |

Tab. S11. The addition amounts of LGA and *Scenedesmus* sp. EPS in different treatments

| Treatment | Bacteria | Medium | LGA (μg/L) | EPS (mL/L) |
| --- | --- | --- | --- | --- |
| SM | *Methylobacterium* sp. | R2A | 0 | 0 |
| SML | *Methylobacterium* sp. | R2A | 4.8 | 0 |
| SME | *Methylobacterium* sp. | R2A | 0 | 10.0 |
| SS | *Sphingomonas* sp*.* | LB | 0 | 0 |
| SSL | *Sphingomonas* sp*.* | LB | 4.8 | 0 |
| SSE | *Sphingomonas* sp. | LB | 0 | 10.0 |
| SB | *Bradyrhizobium japonicum* | YMA | 0 | 0 |
| SBL | *Bradyrhizobium japonicum* | YMA | 4.8 | 0 |
| SBE | *Bradyrhizobium japonicum* | YMA | 0 | 10.0 |

Tab. S12 The addition amounts of Microbial solution, LGA and *Scenedesmus* sp. EPS in different treatments

| Treatment | Urea (kg/667 m2) | Potassium dihydrogen phosphate (kg/667 m2) | Microbial solution (L/667 m2) | LGA (mg/667 m2) | Scenedesmus sp. EPS (L/667 m2) |
| --- | --- | --- | --- | --- | --- |
| CK | 60 | 45 | 0 | 0 | 0 |
| B | 60 | 45 | 2 | 0 | 0 |
| L | 60 | 45 | 0 | 0.72 | 0 |
| E | 60 | 45 | 0 | 0 | 1.5 |
| LB | 60 | 45 | 2 | 0.72 | 0 |
| EB | 60 | 45 | 2 | 0 | 1.5 |

To test whether Scenedesmus sp. enriches nitrogen-fixing microorganisms and promotes growth via LGA secretion, six treatments were established: CK (chemical fertilizer only), B (chemical fertilizer + bacterial solution, 2 L/667 m²), L (chemical fertilizer + LGA, 0.72 mg/667 m²), E (chemical fertilizer + Scenedesmus sp. EPS, 1.5 L/667 m²), LB (chemical fertilizer + bacterial solution, 2 L/667 m² + LGA, 0.72 mg/667 m²), and EB (chemical fertilizer + bacterial solution, 2 L/667 m² + Scenedesmus sp. EPS, 1.5 L/667 m²). The chemical fertilizer rate matched that used in the uncultivated-soil experiment, and N, P and K inputs were held constant across treatments.

Tab. S13 The addition amounts of *A. azotica* and *Scenedesmus* sp. EPS in different treatments

| Treatment | Urea (kg/667 m2) | Potassium dihydrogen phosphate (kg/667 m2) | Microbial solution (L/667 m2) | *A. azotica* (g/667 m2) | *Scenedesmus* sp. (g/667 m2) |
| --- | --- | --- | --- | --- | --- |
| CK | 60.0 | 45.0 | 0 | 0 | 0 |
| TA | 60.0 | 45.0 | 0 | 10.0 | 0 |
| TS | 60.0 | 45.0 | 0 | 0 | 1.31 |
| TB | 60.0 | 45.0 | 2.0 | 0 | 0 |
| TBA | 60.0 | 45.0 | 2.0 | 10.0 | 0 |
| TBS | 60.0 | 45.0 | 2.0 | 0 | 1.31 |

A pot experiment was conducted to validate the effects of co-applying Scenedesmus sp. with nitrogen-fixing bacteria. The soil was the same as that used in the uncultivated-soil experiment. Six treatments were established: CK (chemical fertilizer only), TA (chemical fertilizer + A. azotica, 10 g/667 m²), TS (chemical fertilizer + Scenedesmus sp., 1.31 g/667 m²; N-equivalent to 10 g A. azotica,), TB (chemical fertilizer + bacterial solution, 2 L/667 m²), TBA (chemical fertilizer + bacterial solution, 2 L/667 m² + A. azotica, 10 g/667 m²), and TBS (chemical fertilizer + bacterial solution, 2 L/667 m² + Scenedesmus sp., 1.31 g/667 m²). The chemical fertilizer rate was identical across treatments and matched that in the uncultivated-soil experiment; N, P, and K inputs were kept constant.

Tab. S14 Network properties of co-occurrence networks

| Network Indexes | CK | A | AS |
| --- | --- | --- | --- |
| Nodes | 174 | 179 | 138 |
| Links | 1230 | 1714 | 914 |
| Network diameter | 22 | 14 | 10 |
| Average degree | 14.138 | 19.151 | 13.246 |
| Average clustering coefficient | 0.859 | 0.888 | 0.8668 |
| Average path distance | 5.734 | 3.868 | 2.584 |
| Modularity | 0.859 | 0.679 | 0.681 |
| Positively correlation | 85.37% | 93.29% | 78.88% |
| Negatively correlation | 14.63% | 6.71% | 21.12% |

Appendix

Tab. S15 Abbreviations in the Fig. 5

| Abbreviations | Expanded form |
| --- | --- |
| EPS | Extracellular polymeric substance |
| PAL | Phenylalnine ammonialyase |
| LOX | Lipoxygenase |
| MBC | Microbial biomass carbon |
| IAA | Indole-3-Acetic Acid |
| C6H4Cl2O5 | (2E)-2,5-Dichloro-4-oxo-2-hexenedioic acid |
| C36H66N6O6 | Cyclo(D-leucyl-L-leucyl-L-leucyl-L-leucyl-L-leucyl-L-leucyl) |
| C9H10ClNO2 | 2-amino-3-(2-chloro-phenyl)-propionic acid |
| C52H92N2O10 | (3S,5R,8R,9R,10R,12R,13R,14R,17S)-17-[(2R)-2,6-Dihydroxy-6-methyl-2-heptanyl]-4,4,8,10,14-pentamethylhexadecahydro-1H-cyclopenta[a]phenanthrene-3,12-diyl (2S,2′S)bis[4-methyl-2-({[(2-methyl-2-propanyl )oxy]carbonyl}amino)pentanoate] (non-preferred name) |
| C16H6Cl4N2O4 | (2-Oxido-1,2,5-oxadiazole-3,4-diyl)bis[(3,4-dichlorophenyl)methanone] |
| C16H35NO2 | Lauryldiethanolamine |
| C6H11NO | Caprolactam |
| C72H93N17O13 | N~2~-(N-{(2E)-2-[(N-Acetylglycyl-D-lysyl)amino]-3-phenyl-2-propenoyl}-L-tryptophyl-L-alanyl)-N~6~-(N-{(2Z)-2-[(N-acetylglycyl-D-lysyl)amino]-3-phenyl-2-propenoyl}-L-tryptophyl-L-alanyl)-D-lysinamide |
| C18H32N2O3 | 3-Cyclopropyl-1-[(3R,4R)-3-{[(2R,6S)-2,6-dimethyl-4-morpholinyl]methyl}-4-(hydroxymethyl)-1-pyrrolidinyl]-1-propanone |
| C18H39NO2 | Safingol |
| C25H40N8 | N~2~-[4-({[3-(Cyclohexylamino)propyl]amino}methyl)benzyl]-6-(1-piperazinyl)-2,4-pyrimidinediamine |
| C18H39NO3 | 2-Amino-1,3,4-octadecanetriol |
| C16H35NO3 | C16 phytosphingosine |
| C11H7BrO5S2 | 3-bromo-4-(carboxymethoxy)-2,3′-bithiophene-5-carboxylic acid |
| C6H15NO3 | Triethanolamine |
| C14H31NO | Lauryldimethylamine oxide |
| C7H5BrN4OS | 5-Bromo-N-(4H-1,2,4-triazol-4-yl)-2-thiophenecarboxamide |
| C8H7N | Indole |
| C10H16N2O8 | Ethylenediaminetetraacetic acid |
| C19H35N5 | 1-(Cyclopropylmethyl)-N-{[5-(dimethylamino)-3-isopropyl-1-methyl-1H-pyrazol-4-yl]methyl}-4-piperidinamine |
| C24H30O6 | Bis(4-ethylbenzylidene)sorbitol |
| C10H21NOSi | 2-[(Trimethylsilyl)oxy]heptanenitrile |
| C6H13NO2 | 6-Aminocaproic acid |
| C14H31NO2 | 1-[(2-Hydroxyethyl)amino]dodecan-2-ol |
| C12H27NO | (2S,3R)-2-aminododecane-1,3-diol |
| C20H43NO3 | C20 phytosphingosine |
| C20H43NO4 | 2-Amino-1,3,4,5-icosanetetrol |
| C6H14O3S | Hexane-1-sulfonic acid |
| C6H8N2OS | 2-(Dimethylamino)thiazole-5-carboxaldehyde |
| C16H35NO | Myristamine oxide |
| C9H11NO2 | L-Phenylalanine |
| C12H12O5 | Radicinin |
| C13H10N2O3S | 2-Phenylbenzimidazole-5-sulfonic acid |
| C10H22O6 | PEG n5 |
| C6H11N3O2 | V-Pyrro/NO |
| C5H9NO4 | L-Glutamic acid |
| C10H21NO5 | 2,5-Anhydro-1-deoxy-1-[(1-hydroxy-2-butanyl)amino]-D-mannitol |
| C8H4O3 | Phthalic anhydride |
| C8H19NO5 | Bis-tris methane |
| C5H5N5O | Guanine |
| C20H42O11 | Decaethylene Glycol |
| C4H11NO3 | Tris(hydroxymethyl)aminomethane |
| C14H31NO3 | 2-[Bis(3-methylbutyl)amino]-2-(hydroxymethyl)-1,3-propanediol |
| C5H10N2O3 | DL-Glutamine |
| C11H15N5O3S | 5'-S-Methyl-5'-thioadenosine |
| C5H4N4O | Hypoxanthine |
| C10H14N5O7P | Adenosine 5'-monophosphate |
| C12H27NO | N,N-Dimethyldecylamine N-oxide |

The microalgal cells were observed under the Nikon Eclipse Ti2 microscope.


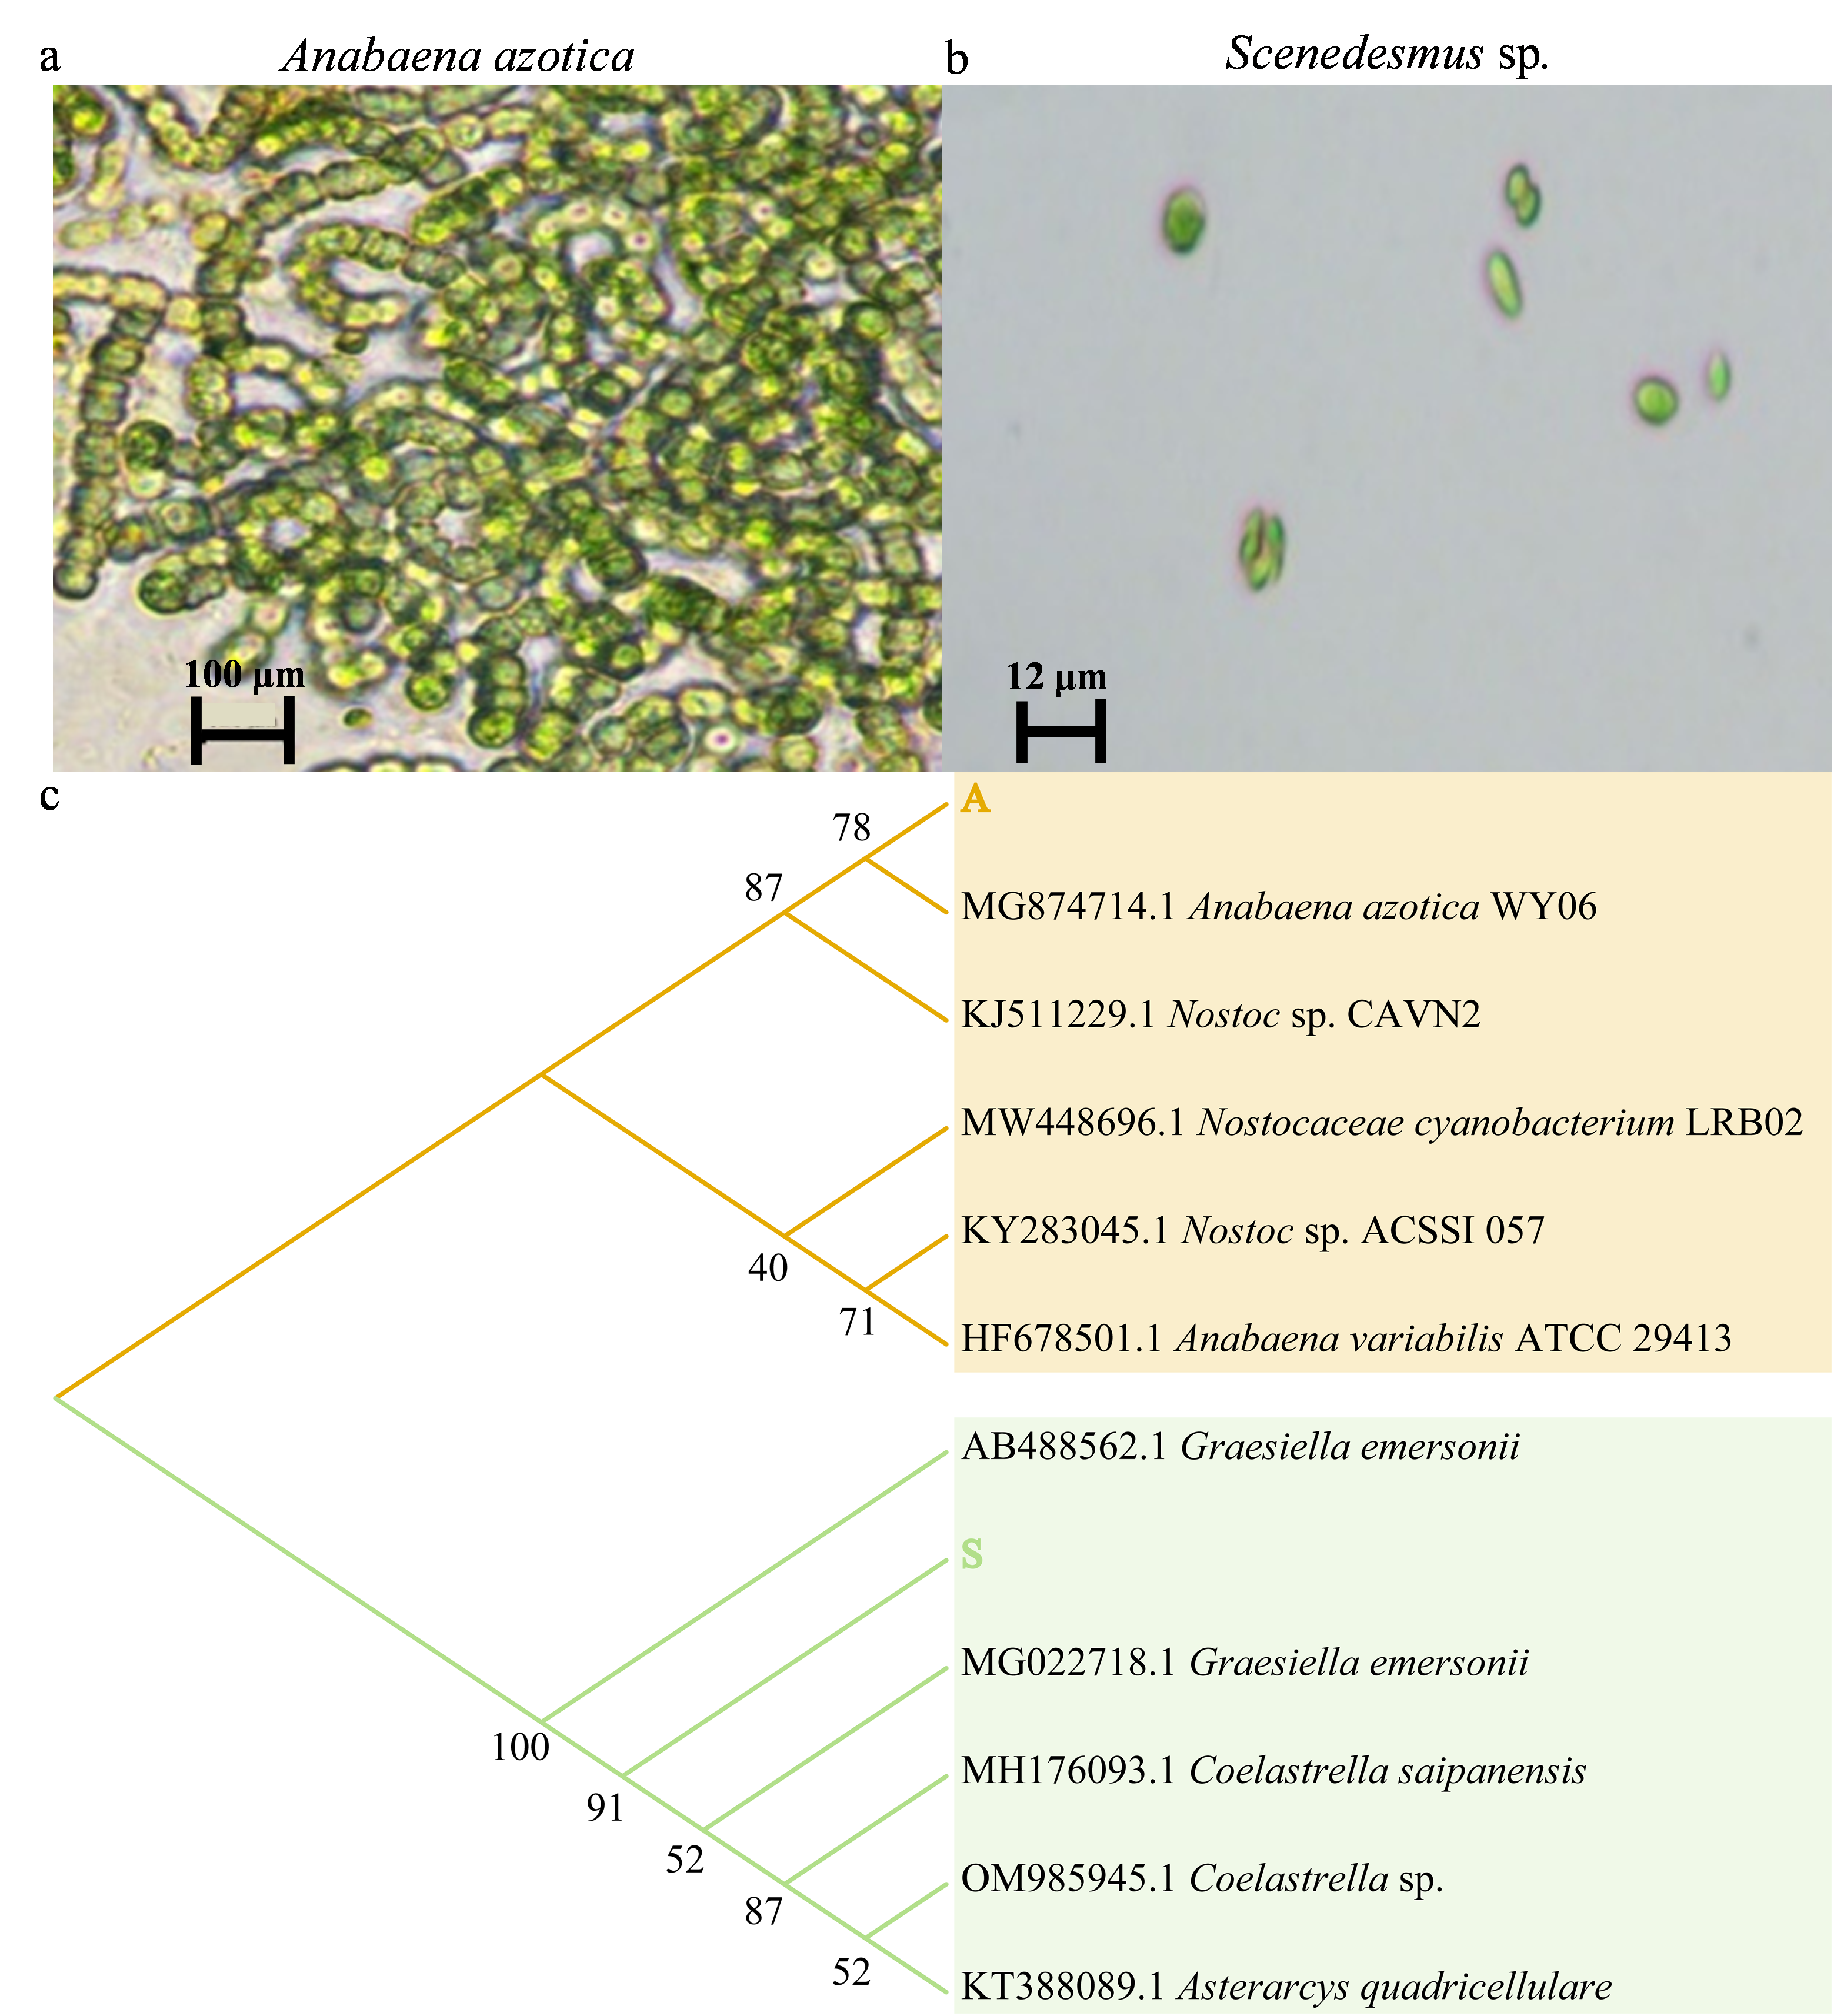


Fig. S1 Identification of microalgae. Microscopic images of (a) *A. azotica* and (b) *Scenedesmus* sp.. (c) Phylogenetic tree diagram of microalgae.

Pot experiments using uncultivated soil and field experiment using cultivated soil were conducted to assess the effects of microalgae on pepper growth and yield.


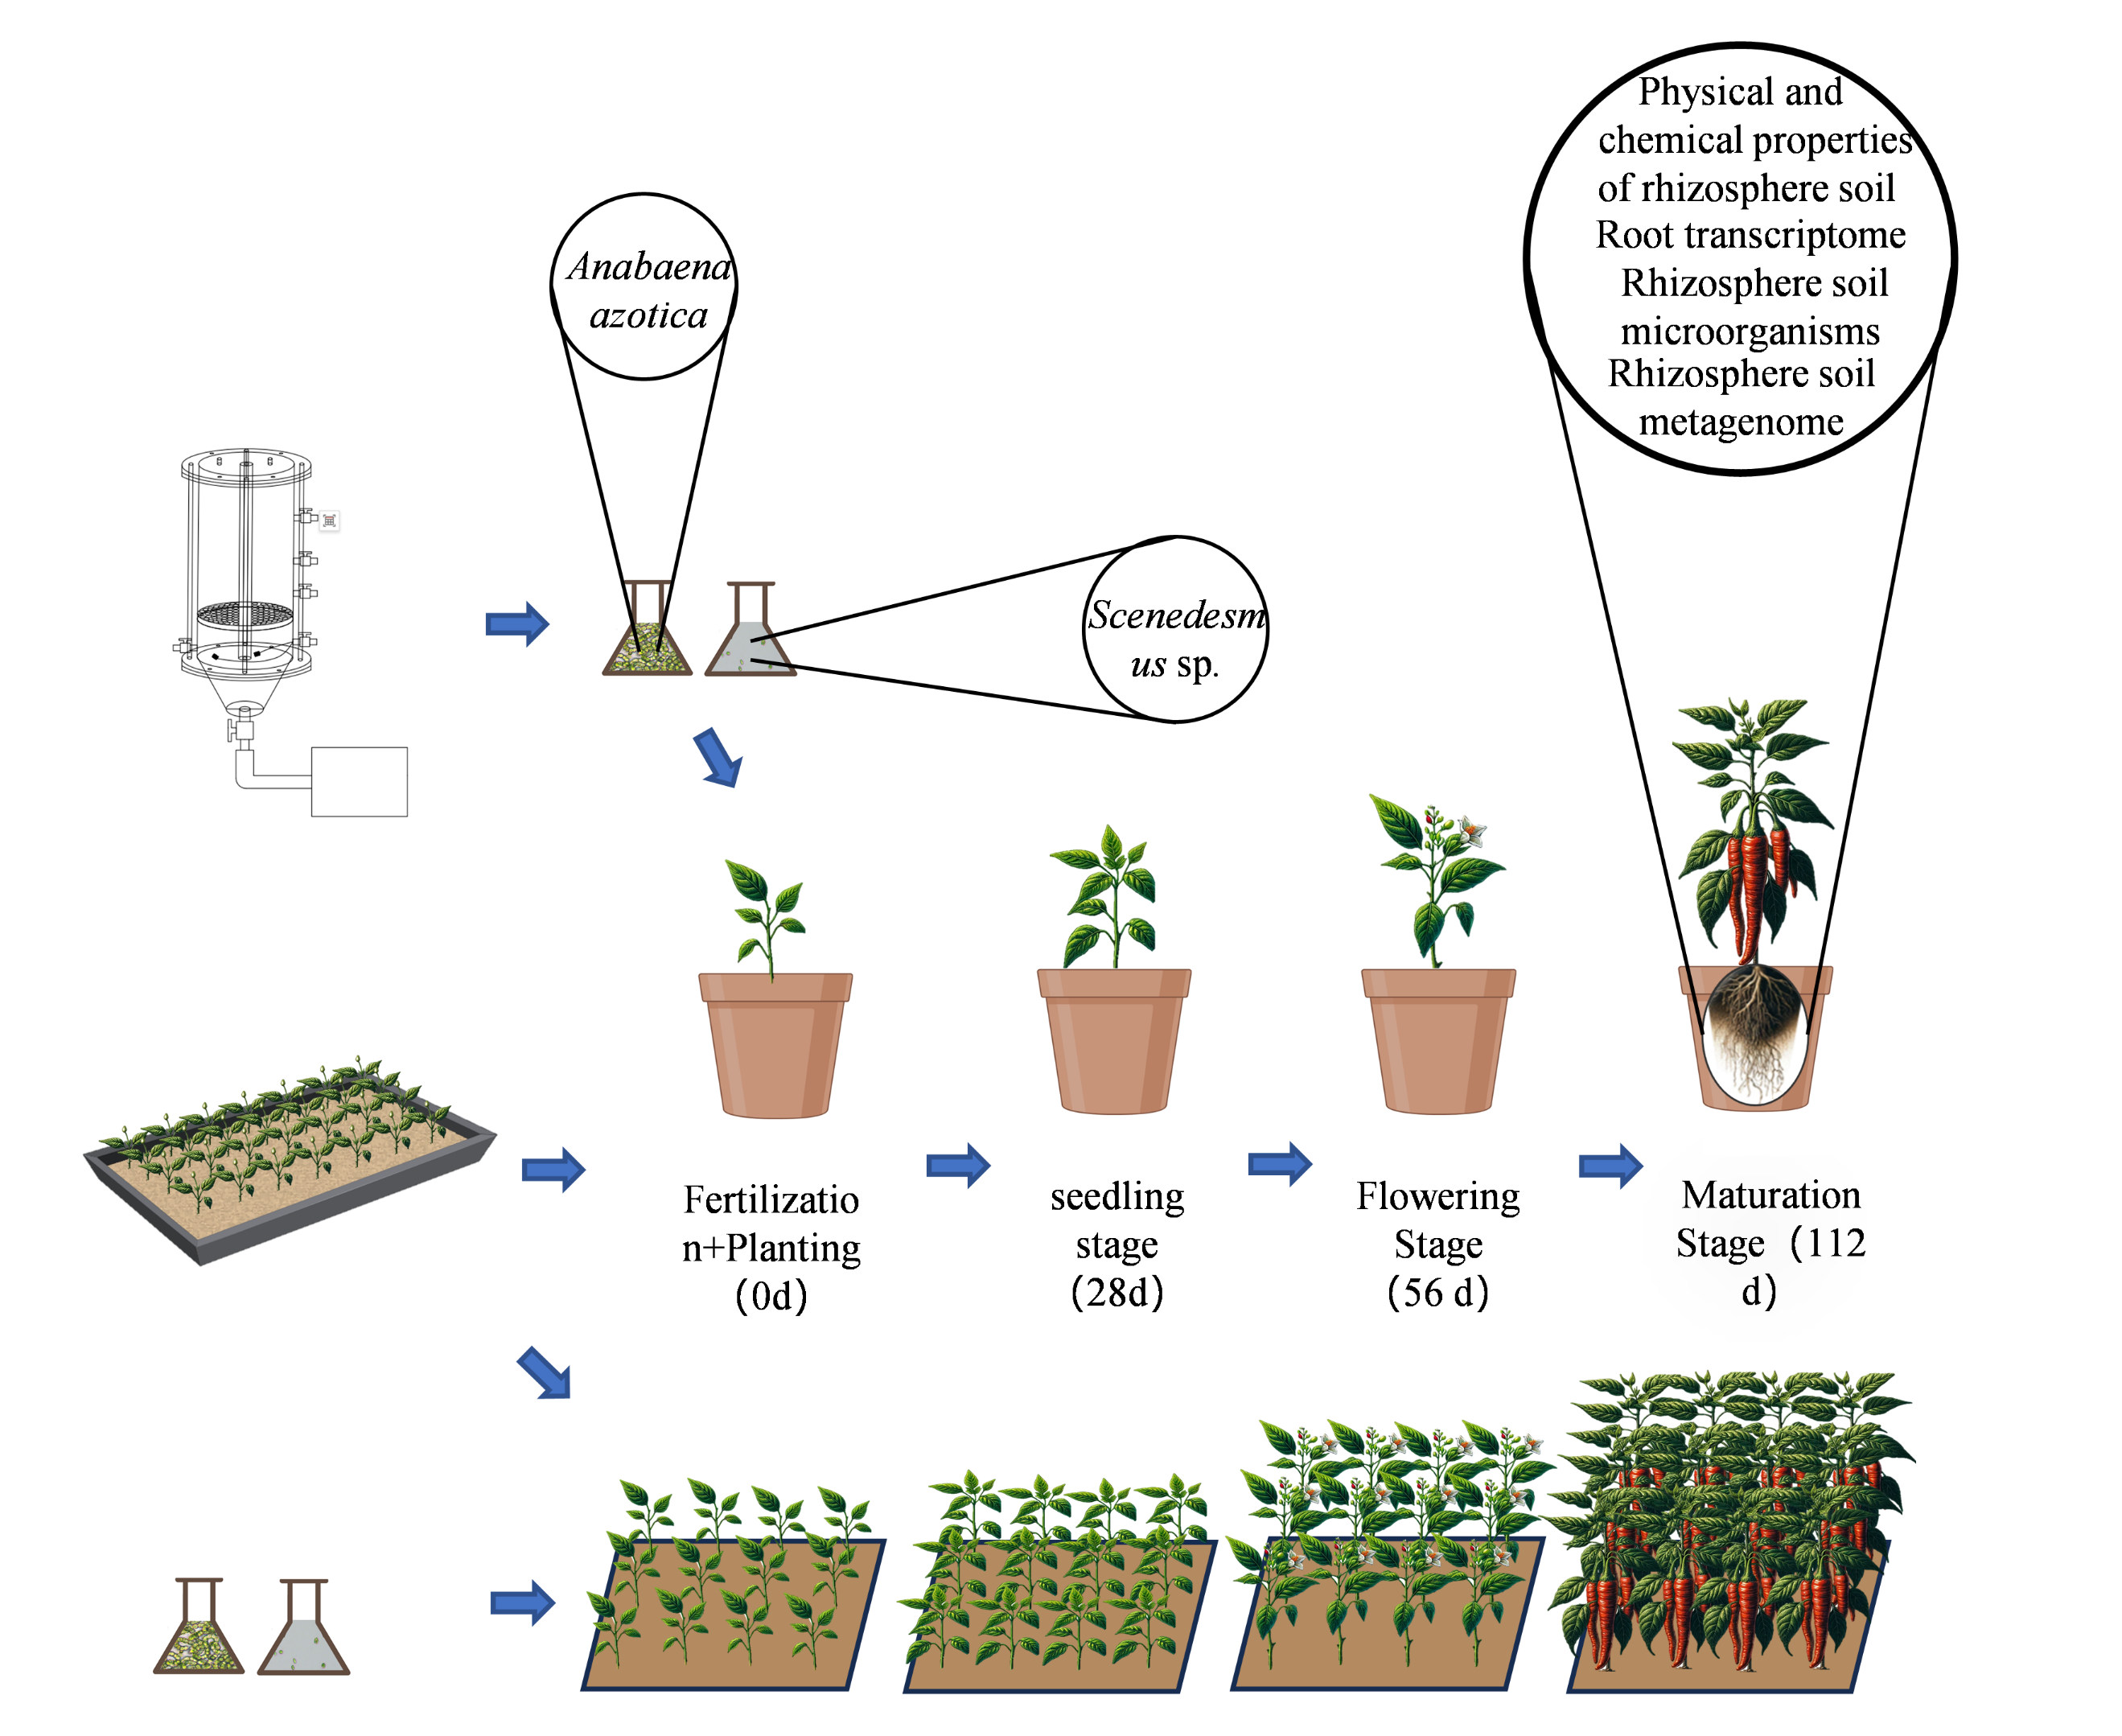


Fig. S2 Experimental design

In the cultivated soil, the A and AS applications exhibited similar growth-promoting effects.


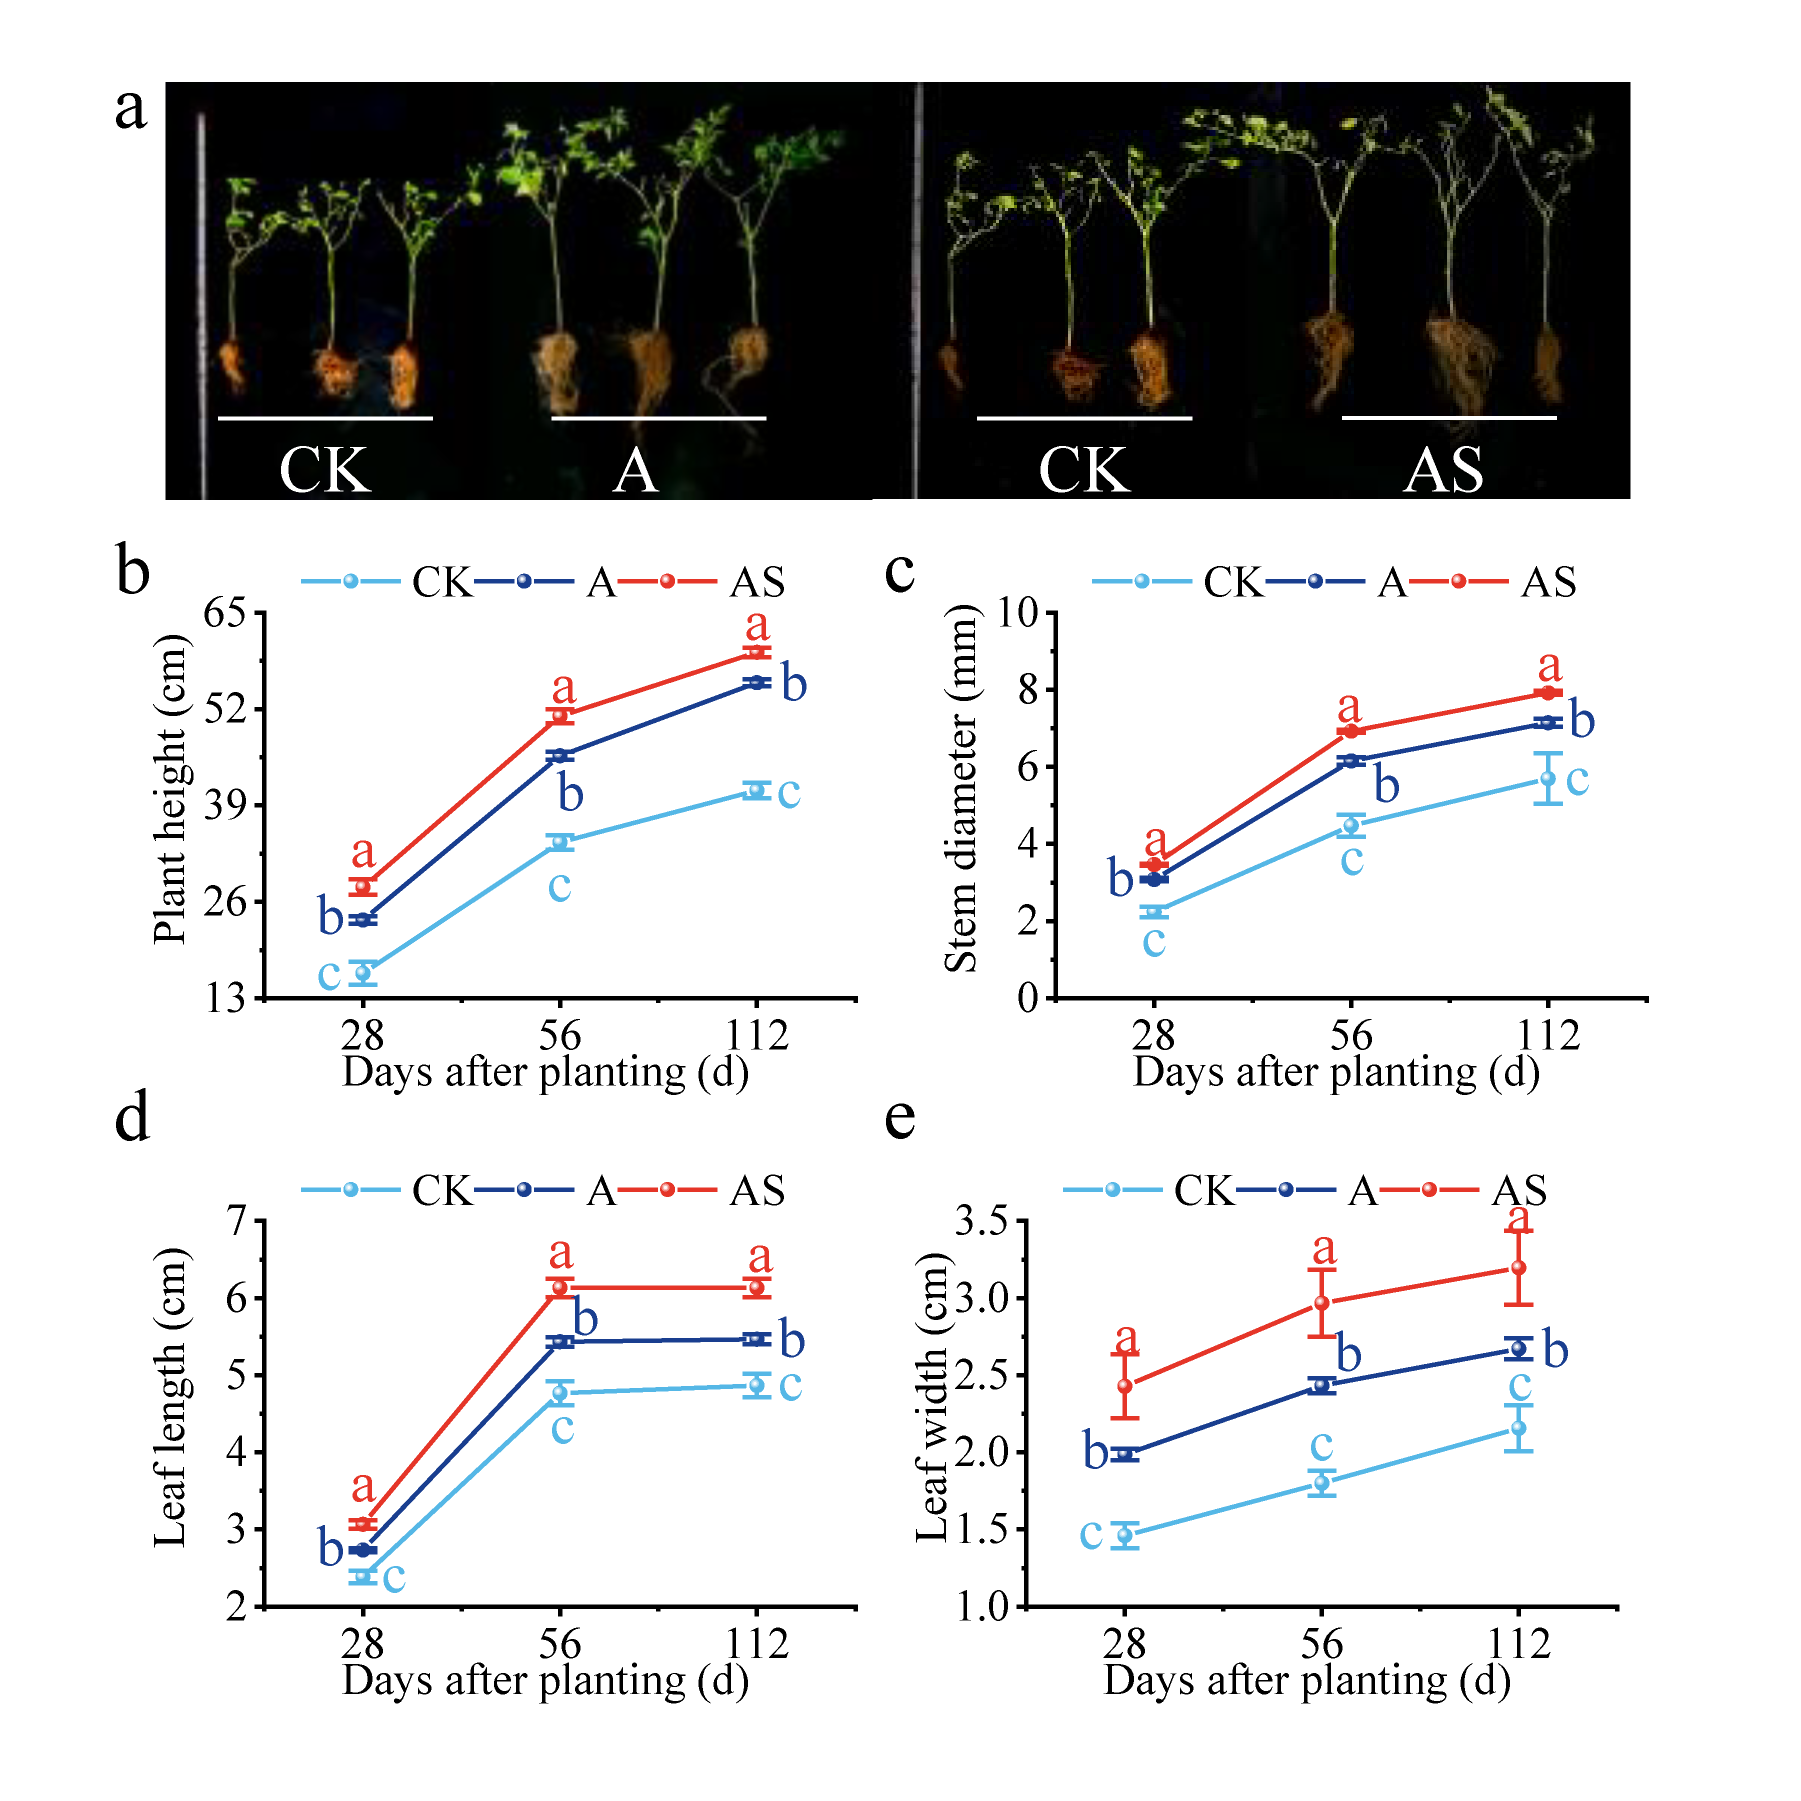


Fig. S3 The effects of microalgae in cultivated soil on pepper growth. (a) Pepper plants under the control treatment and different microalgae treatments. (b) Plant height, (c) stem diameter, (d) leaf length, and (e) leaf width of peppers under the control treatment and different microalgae treatments at different time periods. The sample size for all treatments in the figure was 6. Data in figures (b-c) were presented as mean ± standard deviation (SD), and different letters indicated significant differences at *P* < 0.05 (one-way ANOVA corrected by Duncan's test).

In the cultivated soil, the A and AS applications increased pepper yields by 26.91% and 48.05%, respectively.


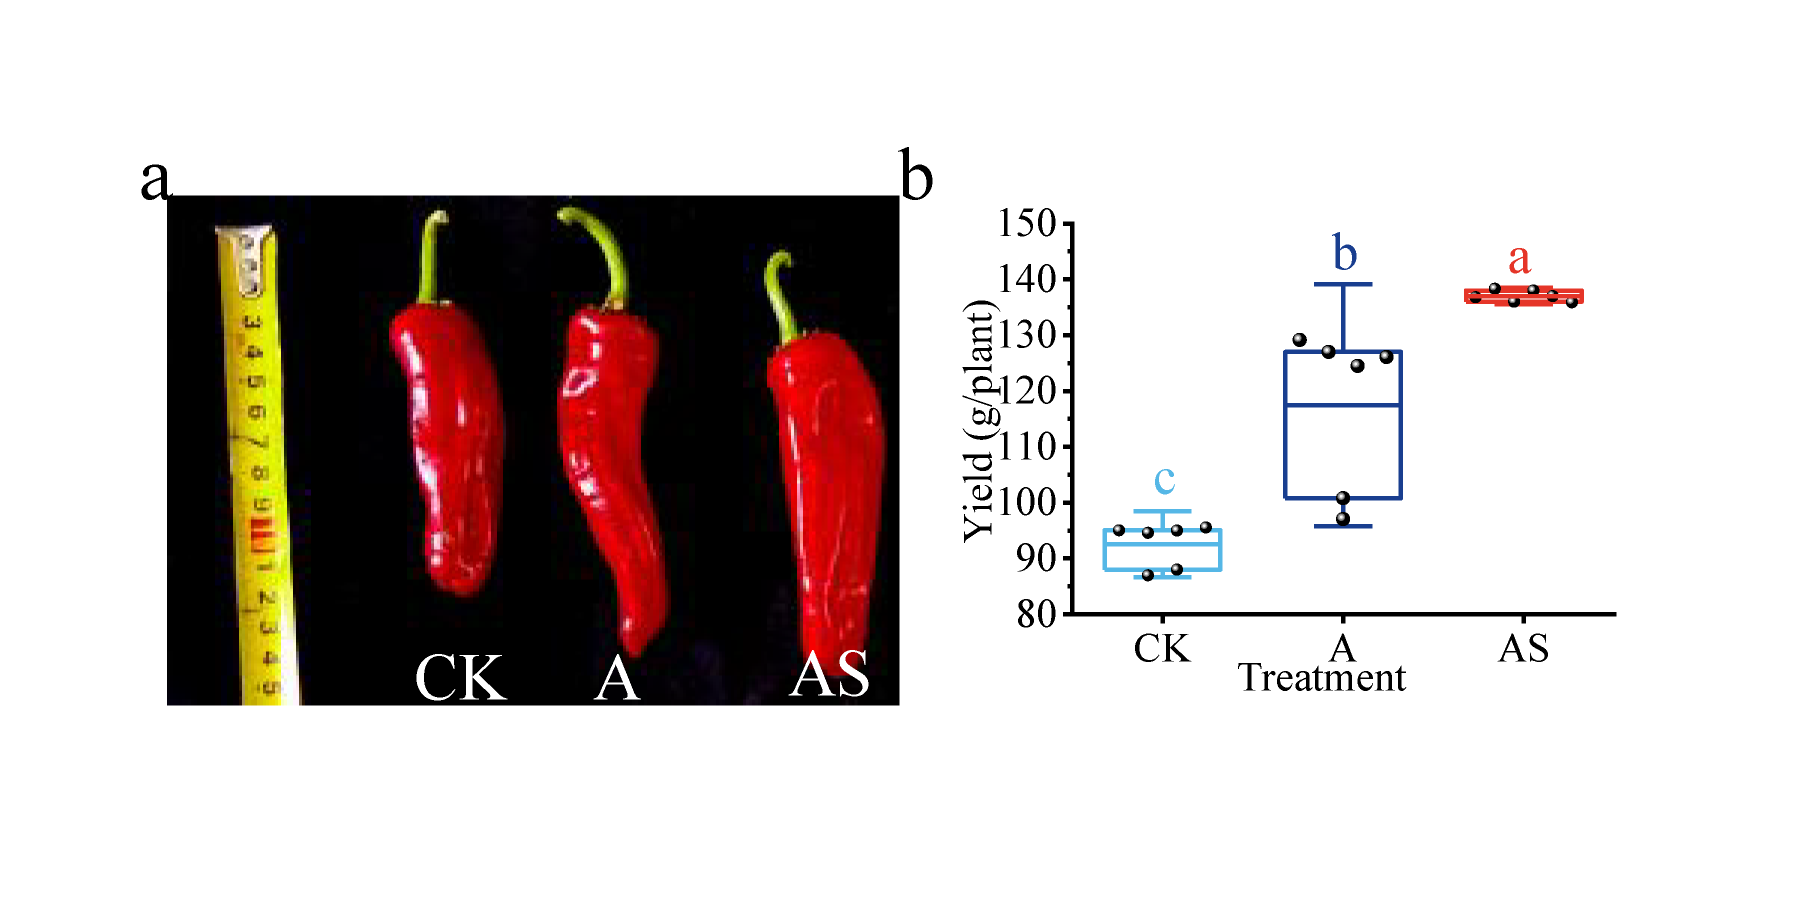


Fig. S4 The effects of microalgae in cultivated soil on pepper yield. (a) Pepper fruits under the control treatment and different microalgae treatments. (b) Pepper yield under the control treatment and different microalgae treatments. The sample size for all treatments in the figure was 6. Different letters indicated significant differences at *P* < 0.05 (one-way ANOVA corrected by Duncan's test).

Both A and AS application significantly increased soil pH in the uncultivated soil at 28 and 56 d post-transplantation, and the AS application also significantly enhanced the soil peroxidase activity.


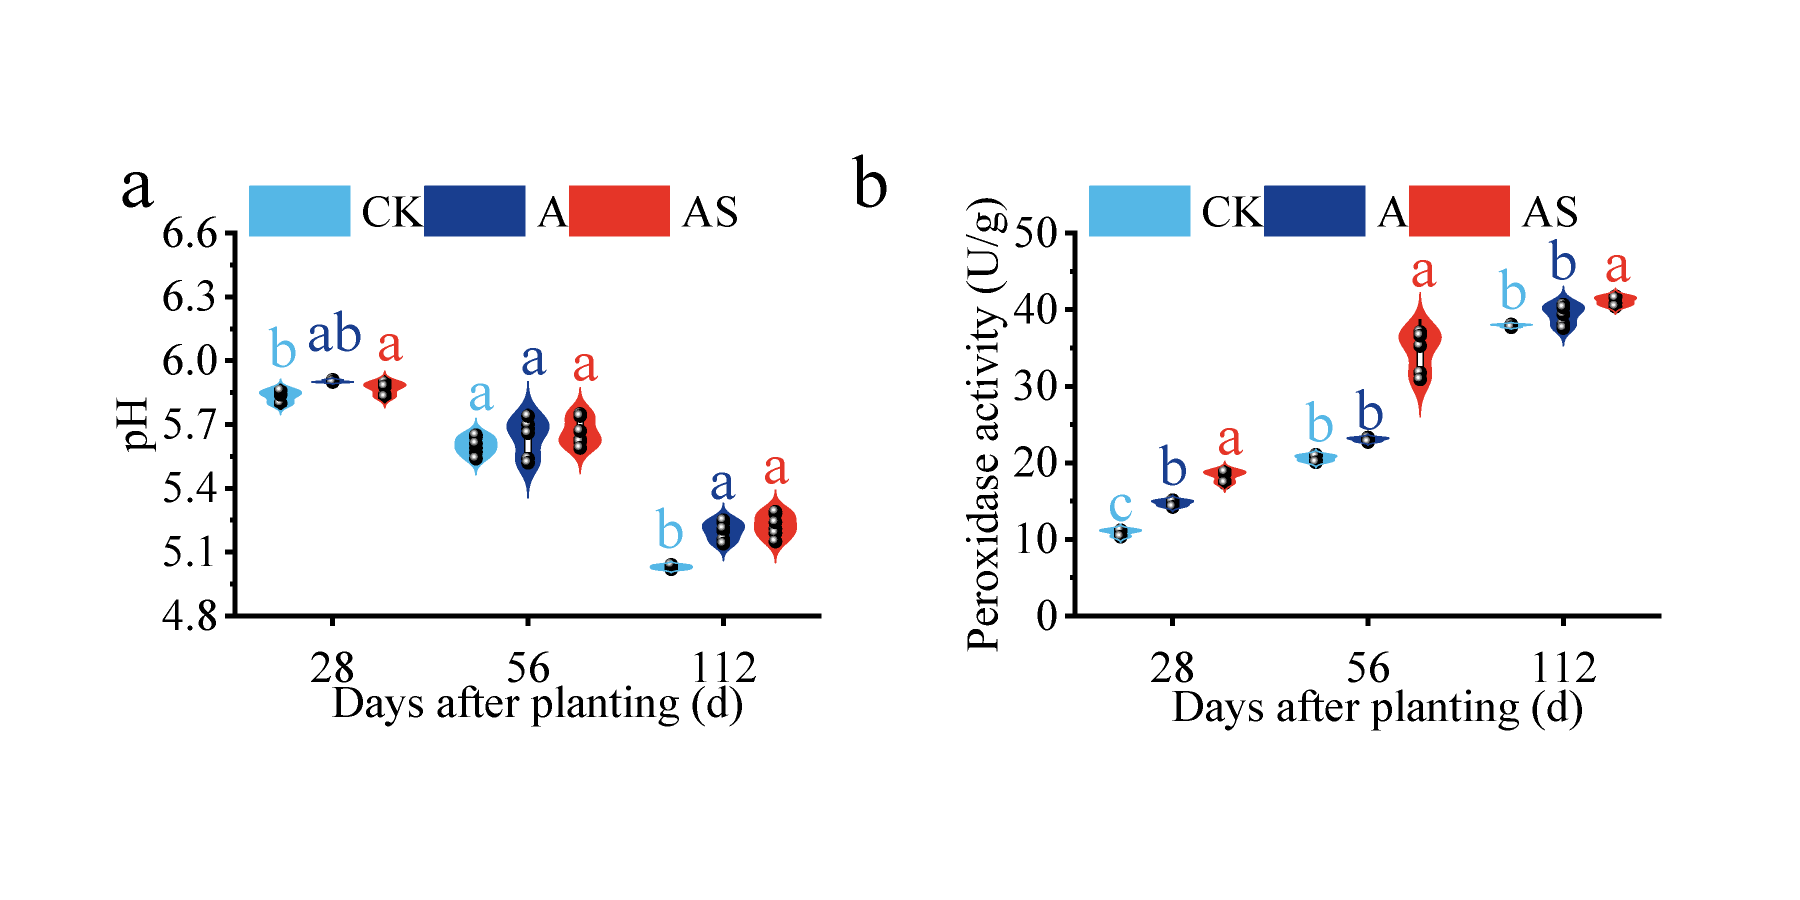


Fig. S5 Soil (a) pH and (b) peroxidase activity under the control treatment and different microalgae treatments at different time periods. The sample size for all treatments in the figure was 6. Different letters indicated significant differences at *P* < 0.05 (one-way ANOVA corrected by Duncan's test).

In the cultivated soil, both A and AS application also enhanced soil pH and SOM content, and the AS application significantly improved available soil nutrient contents and enzyme activities


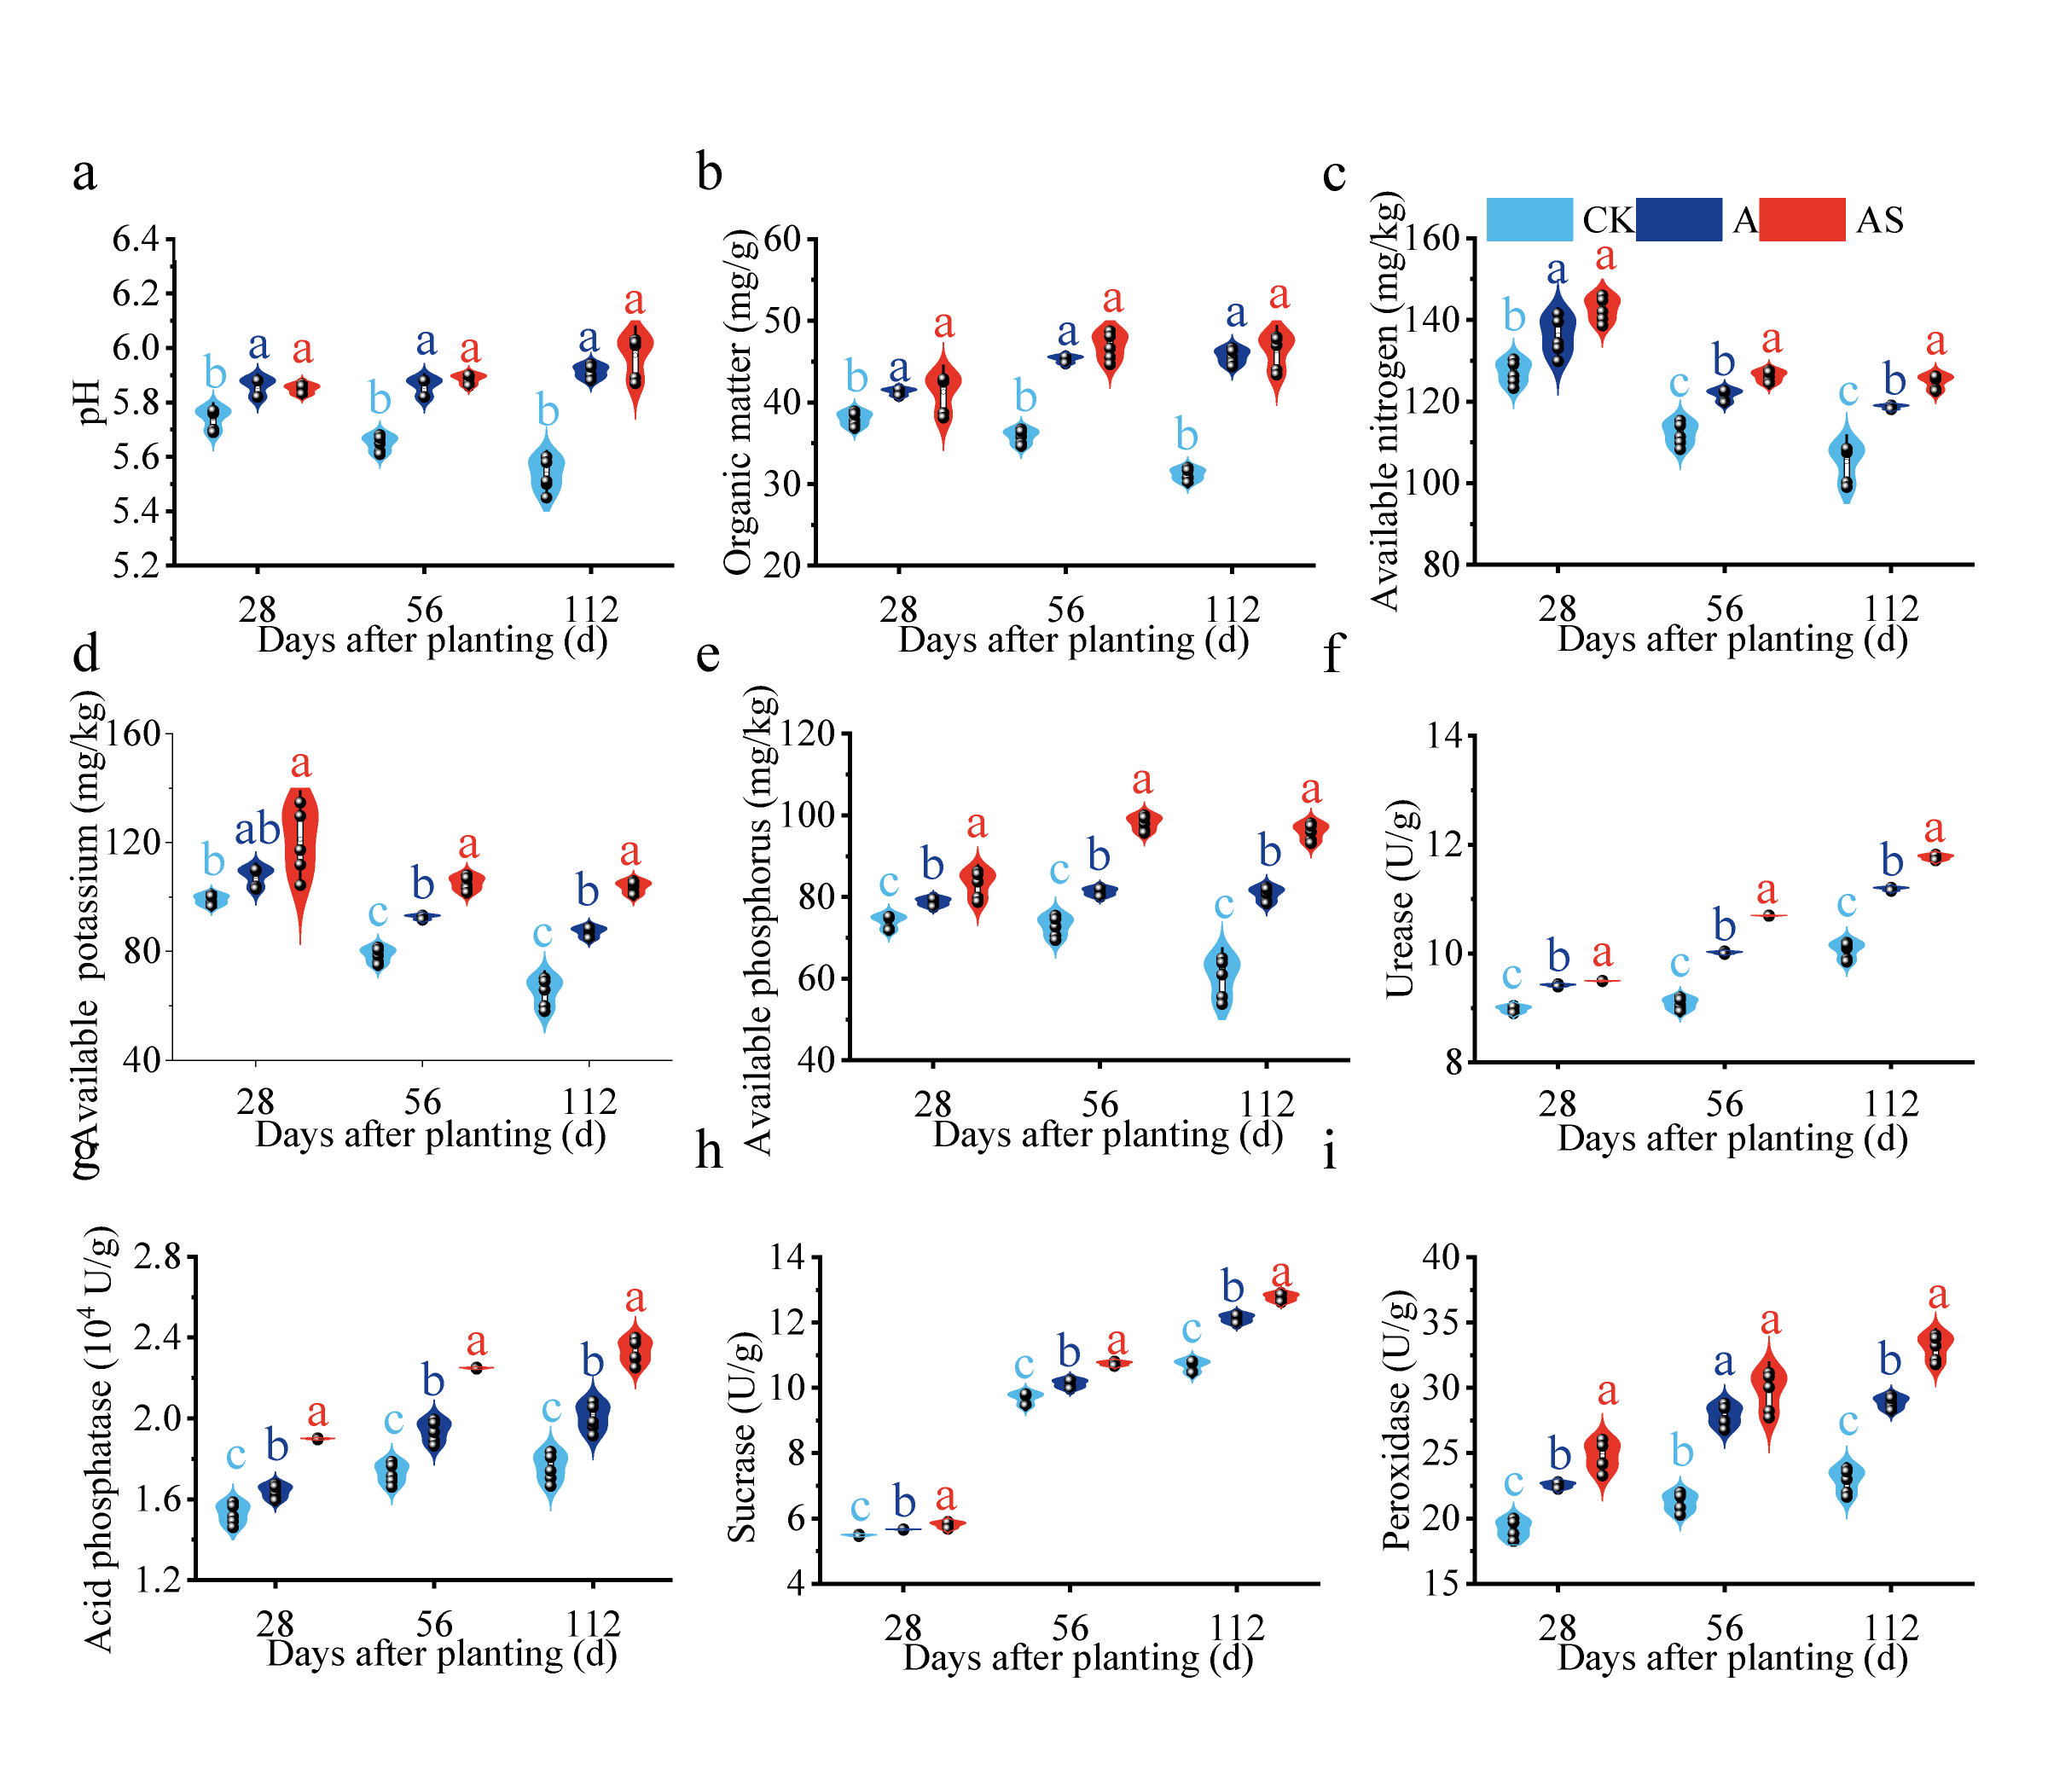


Fig. S6 The effects of microalgae in cultivated soil on the physicochemical properties of pepper rhizosphere soil. Soil (a) pH, (b) organic matter content, (c) available nitrogen content, (d) available phosphorus content, (e) available potassium content, (f) urease activity, (g) acid phosphatase activity, (h) sucrase activity, and (i) peroxidase activity under the control treatment and different microalgae treatments at different time periods. The sample size for all treatments in the figure was 6. Different letters in figures (a-i) indicated significant differences at *P* < 0.05 (one-way ANOVA corrected by Duncan's test).

In the cultivated soil, the RDA results showed that AK content, AP content, urease activity, peroxidase activity, sucrase activity, and AN content significantly affected pepper growth and yield (Fig. S7a). The Mantel test revealed that sucrase activity, urease activity, pH, AN content, AP content, and AK content were the primary factors influencing pepper growth and yield (Fig. S7b).


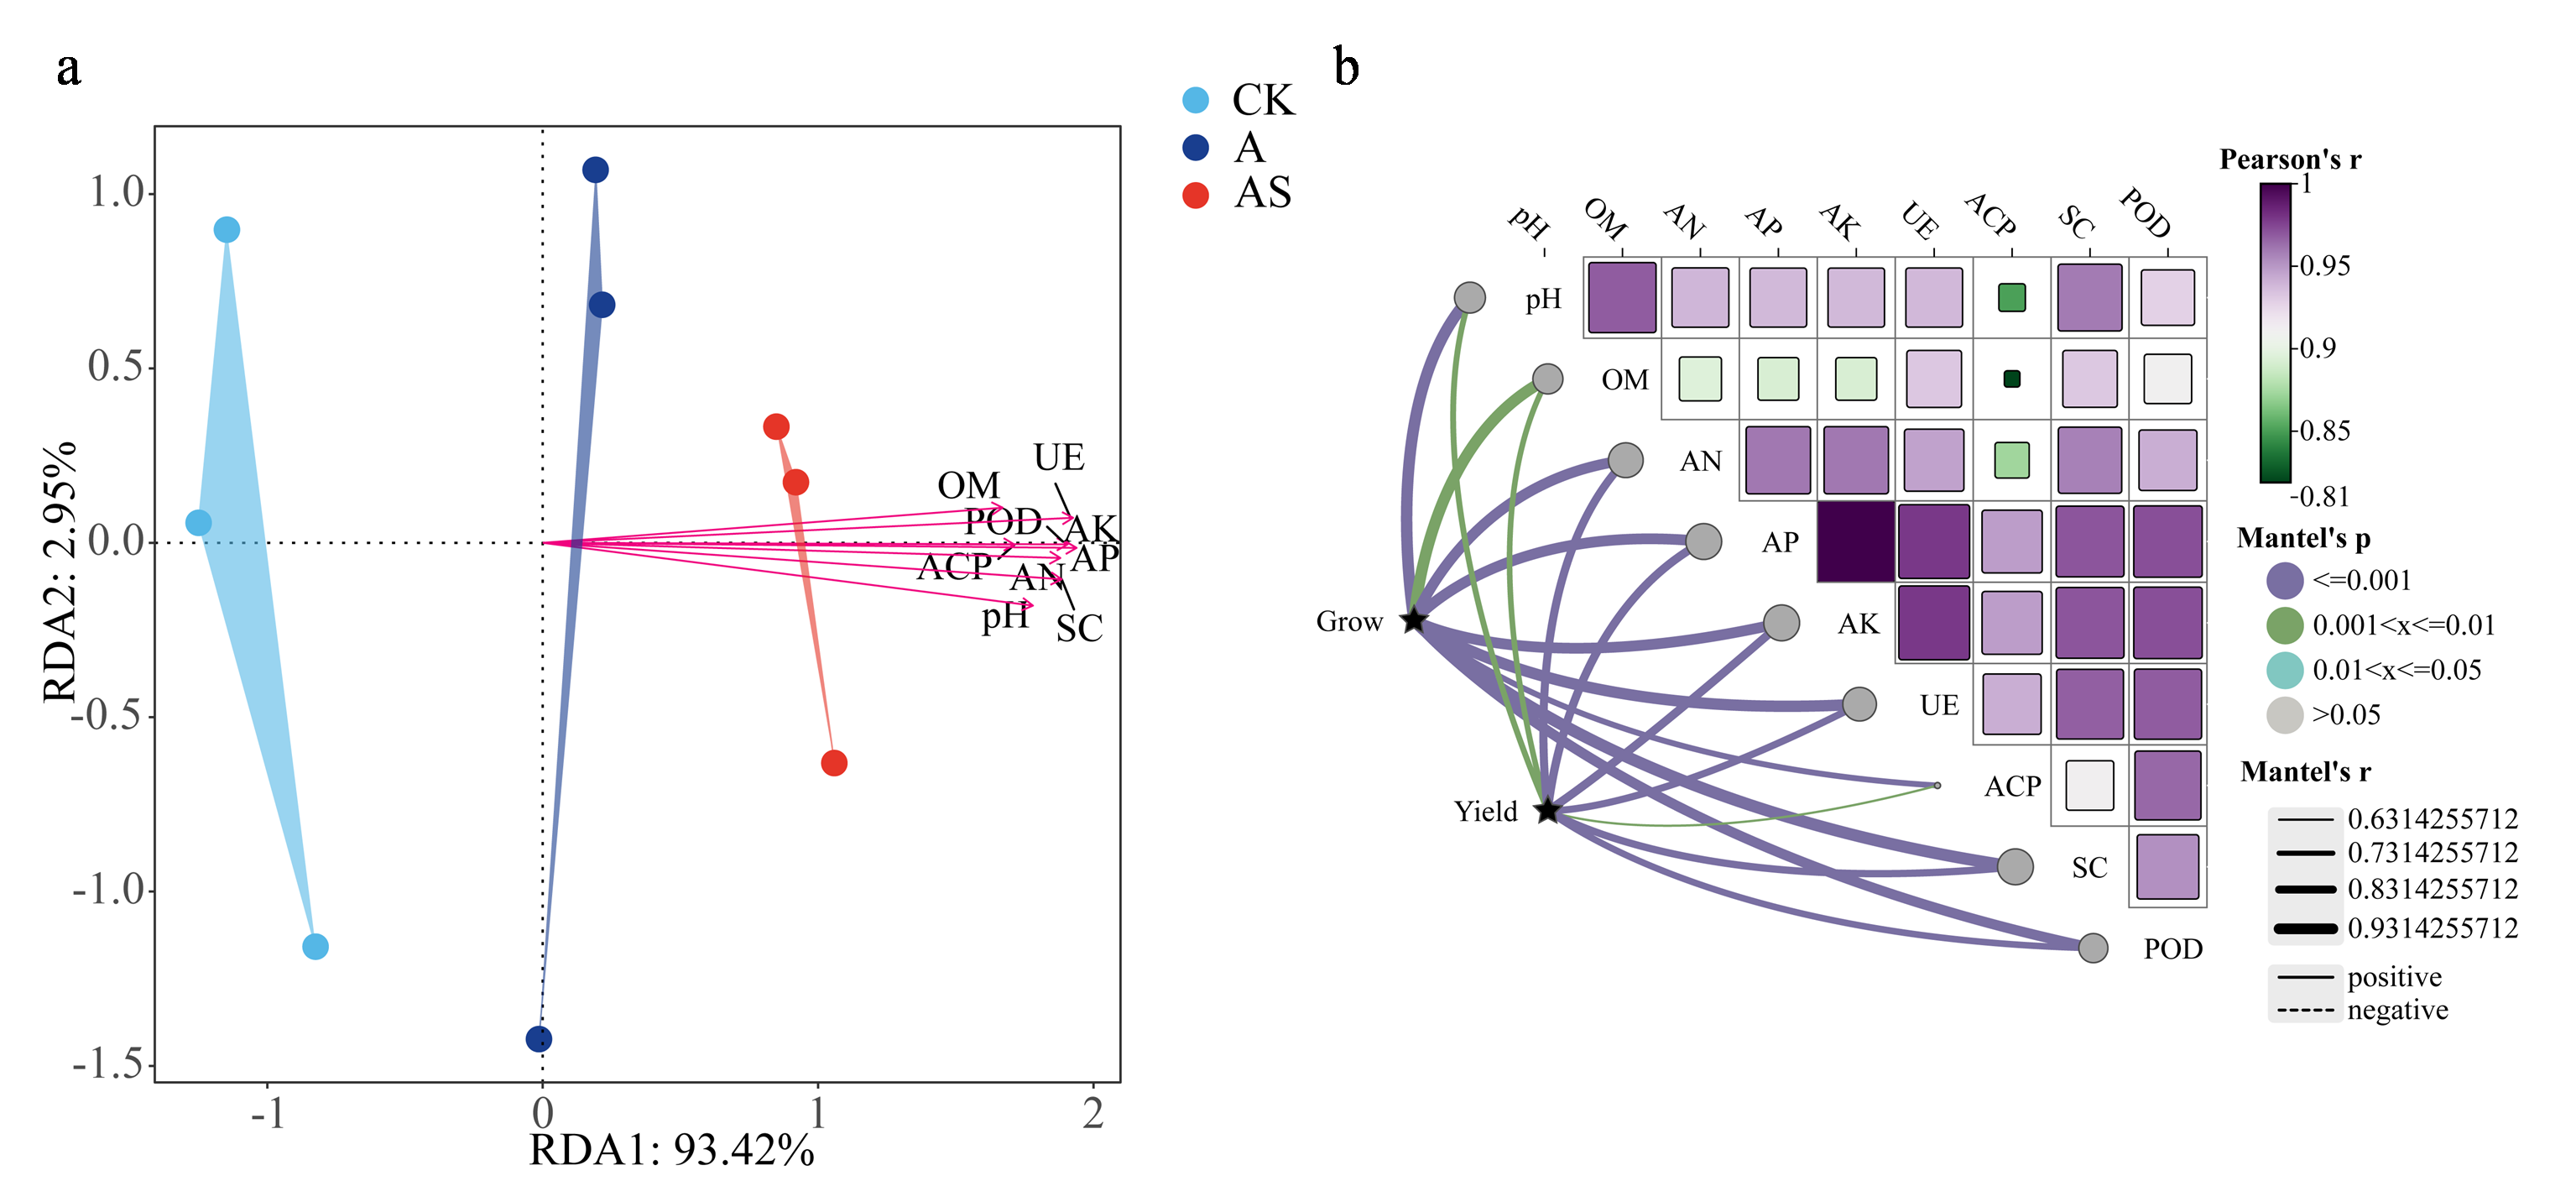


Fig. S7 Soil physicochemical property driving factors of pepper growth and yield in cultivated soil. (a) RDA analysis of pepper growth and yield with soil physicochemical factors. (b) Mantel test analysis of pepper growth and yield with soil physicochemical factors. The sample size for all treatments in the figure was 3. In figure (a), colored dots and triangles represented pepper growth and yield, while vectors represented soil physicochemical properties. Abbreviations in figures (a, b): OM, Organic matter; AN, Available nitrogen; AP, Available phosphorus; AK, Available potassium; UE, Urease; ACP, Acid phosphatase; SC, Sucrase; POD, Peroxidase. Figure (b) showed pairwise comparisons of environmental factors, with color gradient denoting Spearman’s correlation coefficients. Mantel’s r statistics were indicated by line width, and line color represents statistical significance. Solid lines indicated positive correlations, while dashed lines indicated negative correlations.

The potassium content in pepper plants did not differ significantly between the CK and microalgae application groups.


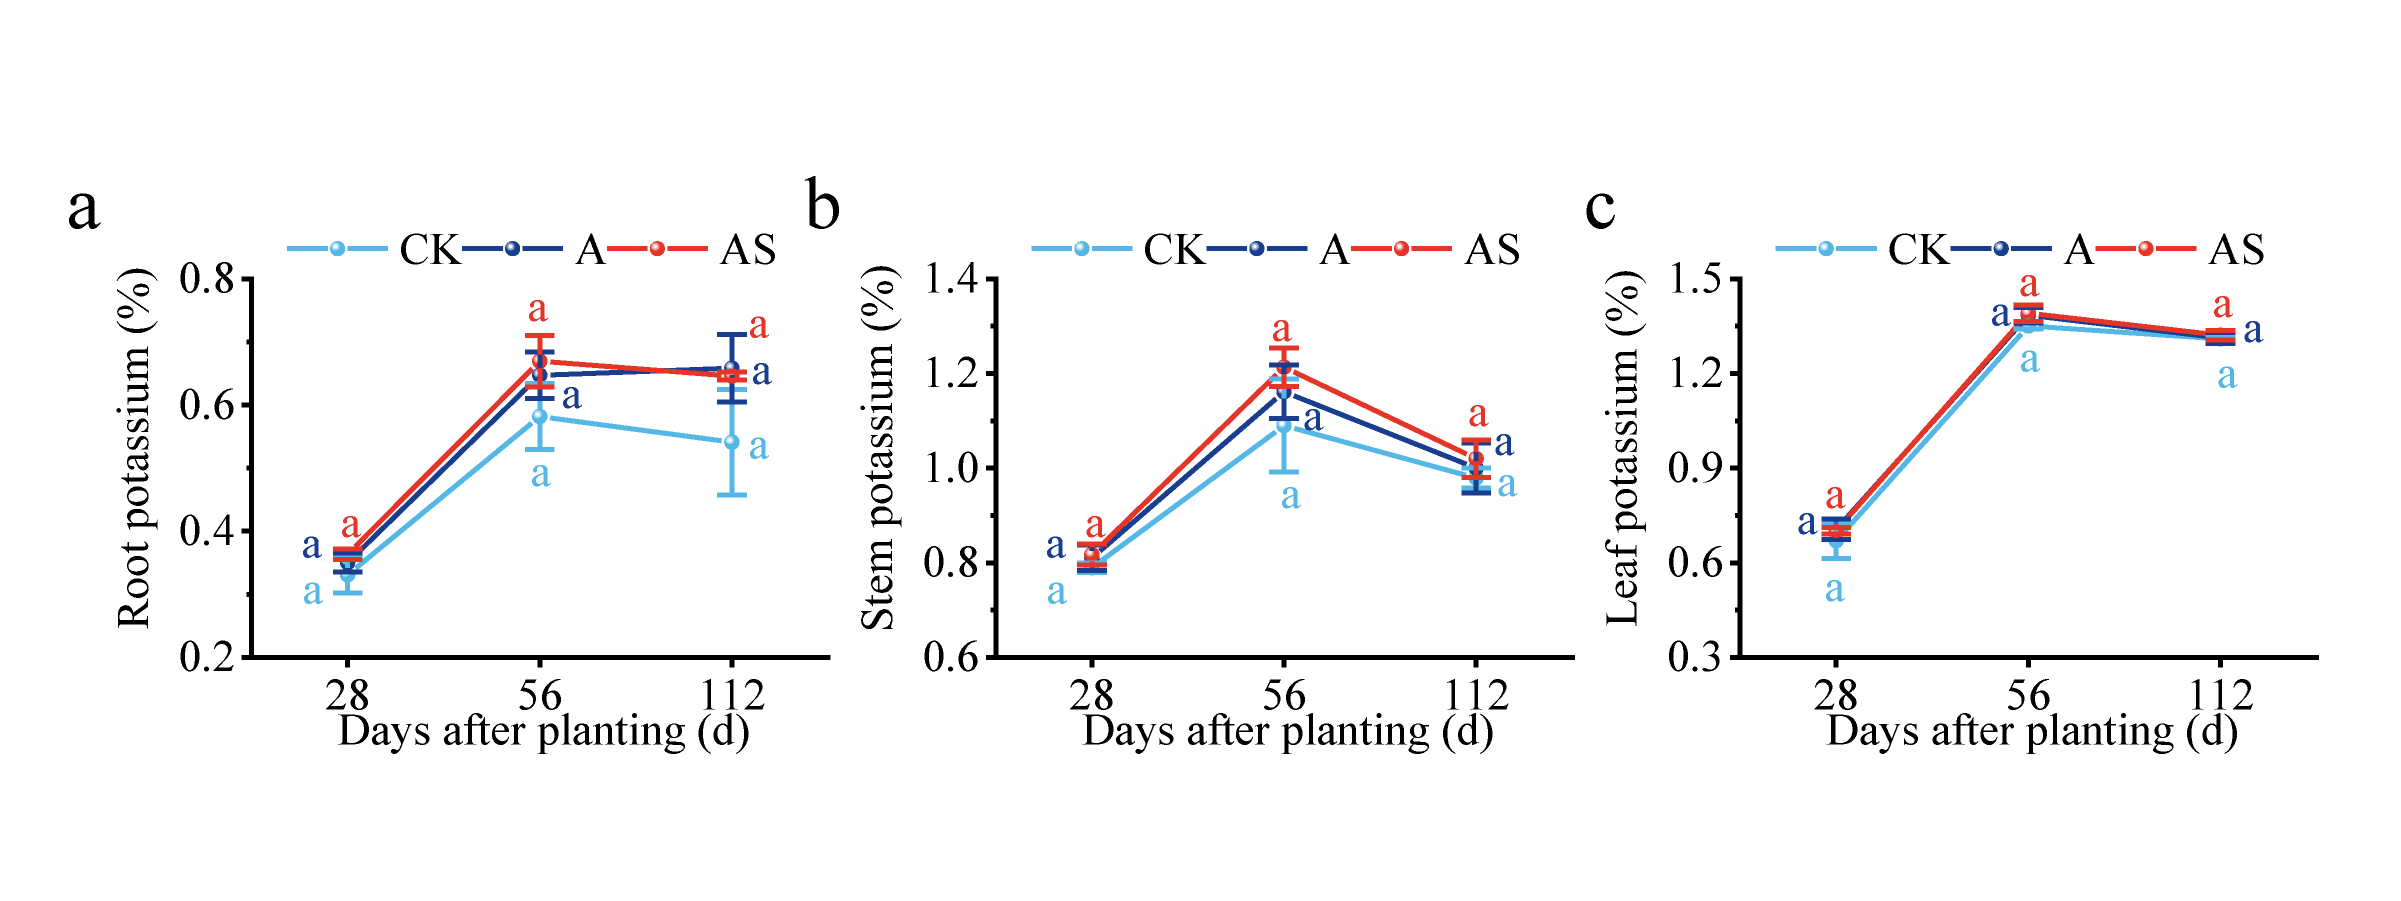


Fig. S8 Potassium content in pepper (a) roots, (b) stems, and (c) leaves under the control treatment and different microalgae treatments at different time periods. The sample size for all treatments in the figure was 6. Different letters indicated significant differences at *P* < 0.05 (one-way ANOVA corrected by Duncan's test).

In the cultivated soil, plant nitrogen content in the A and AS application group exhibited the similar results, but plant phosphorus content showed no significant difference compared to that of the CK group (*P* > 0.05).


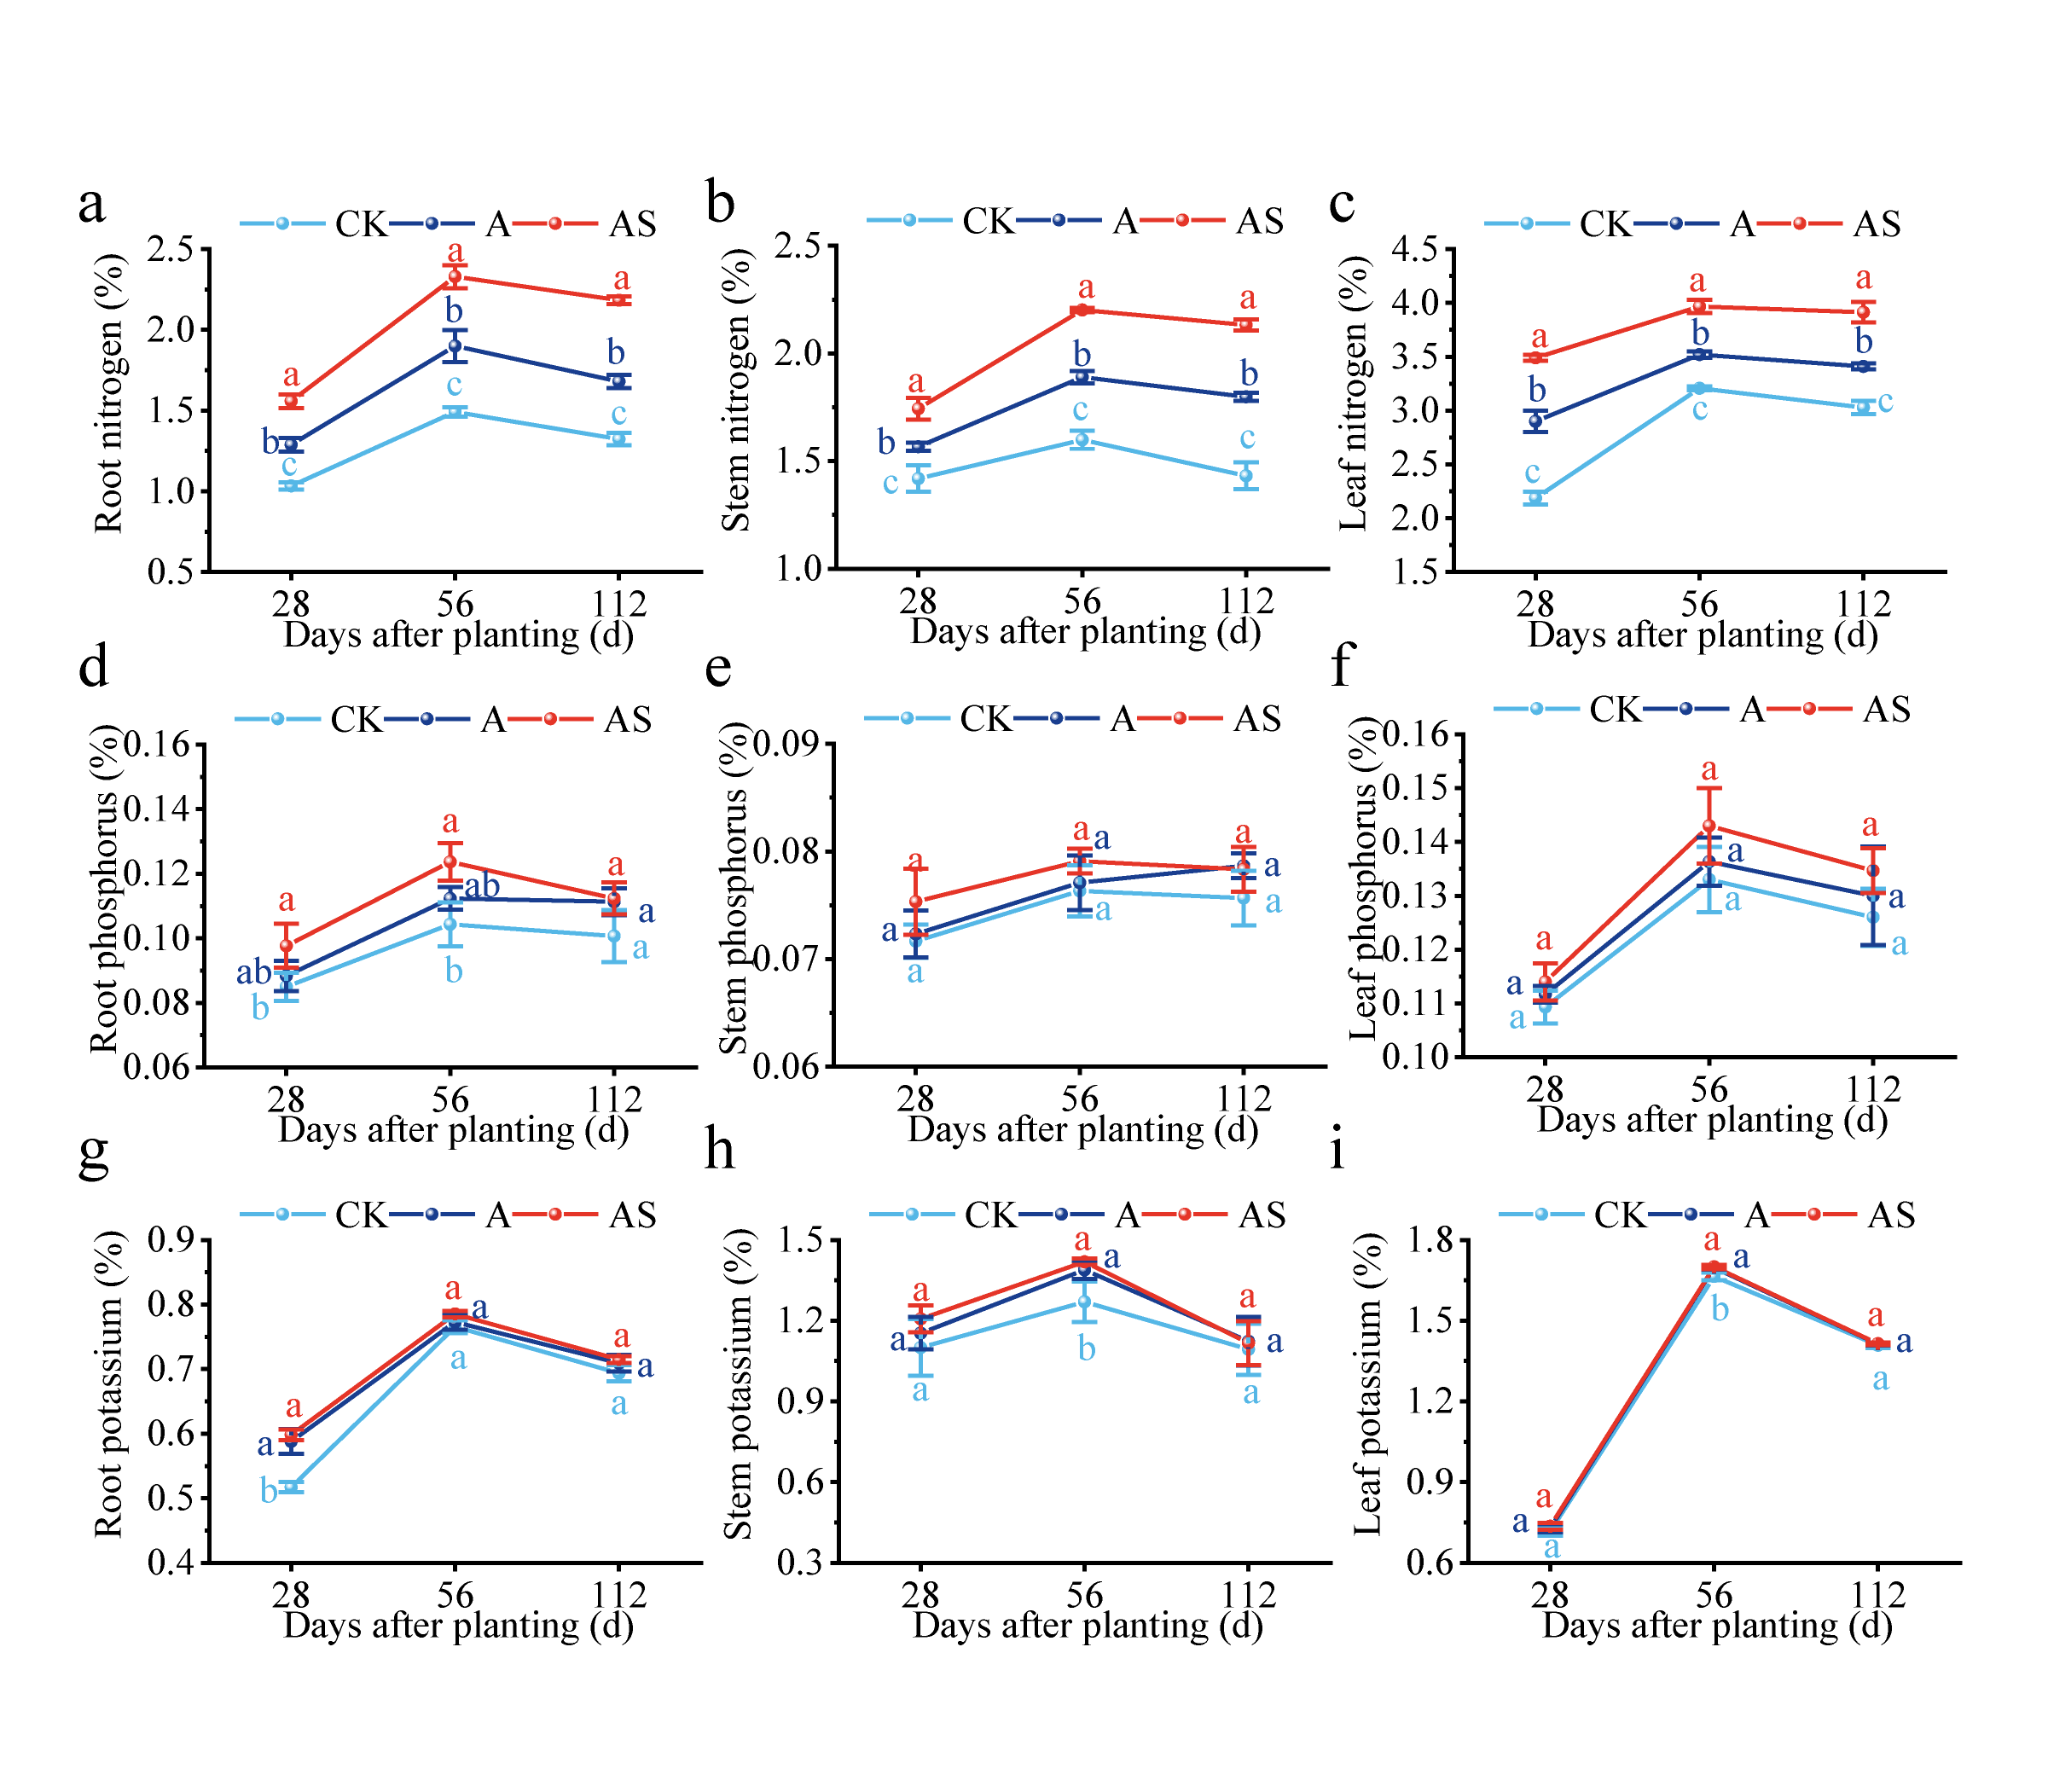


Fig. S9 The effects of microalgae in cultivated soil on nutrient uptake by pepper roots. Nitrogen content in pepper (a) roots, (b) stems, and (c) leaves at different time periods in the control treatment and different microalgae treatments. Phosphorus content in pepper (d) roots, (e) stems, and (f) leaves at different time periods in the control treatment and different microalgae treatments. Potassium content in pepper (g) roots, (h) stems, and (i) leaves at different time periods in the control treatment and different microalgae treatments. The sample size for all treatments in the figure was 6. Different letters indicated significant differences at *P* < 0.05 (one-way ANOVA corrected by Duncan's test).

After the A application, 4,820 differentially expressed genes (DEGs) were identified, of which 2,111 were upregulated and 2,709 were downregulated (Fig. S10a). Clustering analysis of the DEGs revealed that the CK, A application, and AS application all clustered within their groups, with high reproducibility between parallel samples (Fig. S10b). Gene ontology (GO) analysis revealed that the DEGs between the A application and CK were primarily enriched in biological processes (BPs), including the regulation of protein serine/threonine phosphatase activity, abscisic acid-activated signaling pathway, primary cell wall biogenesis in plants, glutathione metabolic process, and ethylene-activated signaling pathway (Fig. S10c). Kyoto Encyclopedia of Genes and Genomes (KEGG) pathway enrichment analysis showed that the A application mainly affected brassinosteroid biosynthesis, monoterpenoid biosynthesis, isoquinoline alkaloid biosynthesis, and nitrogen metabolism (Fig. S10d).


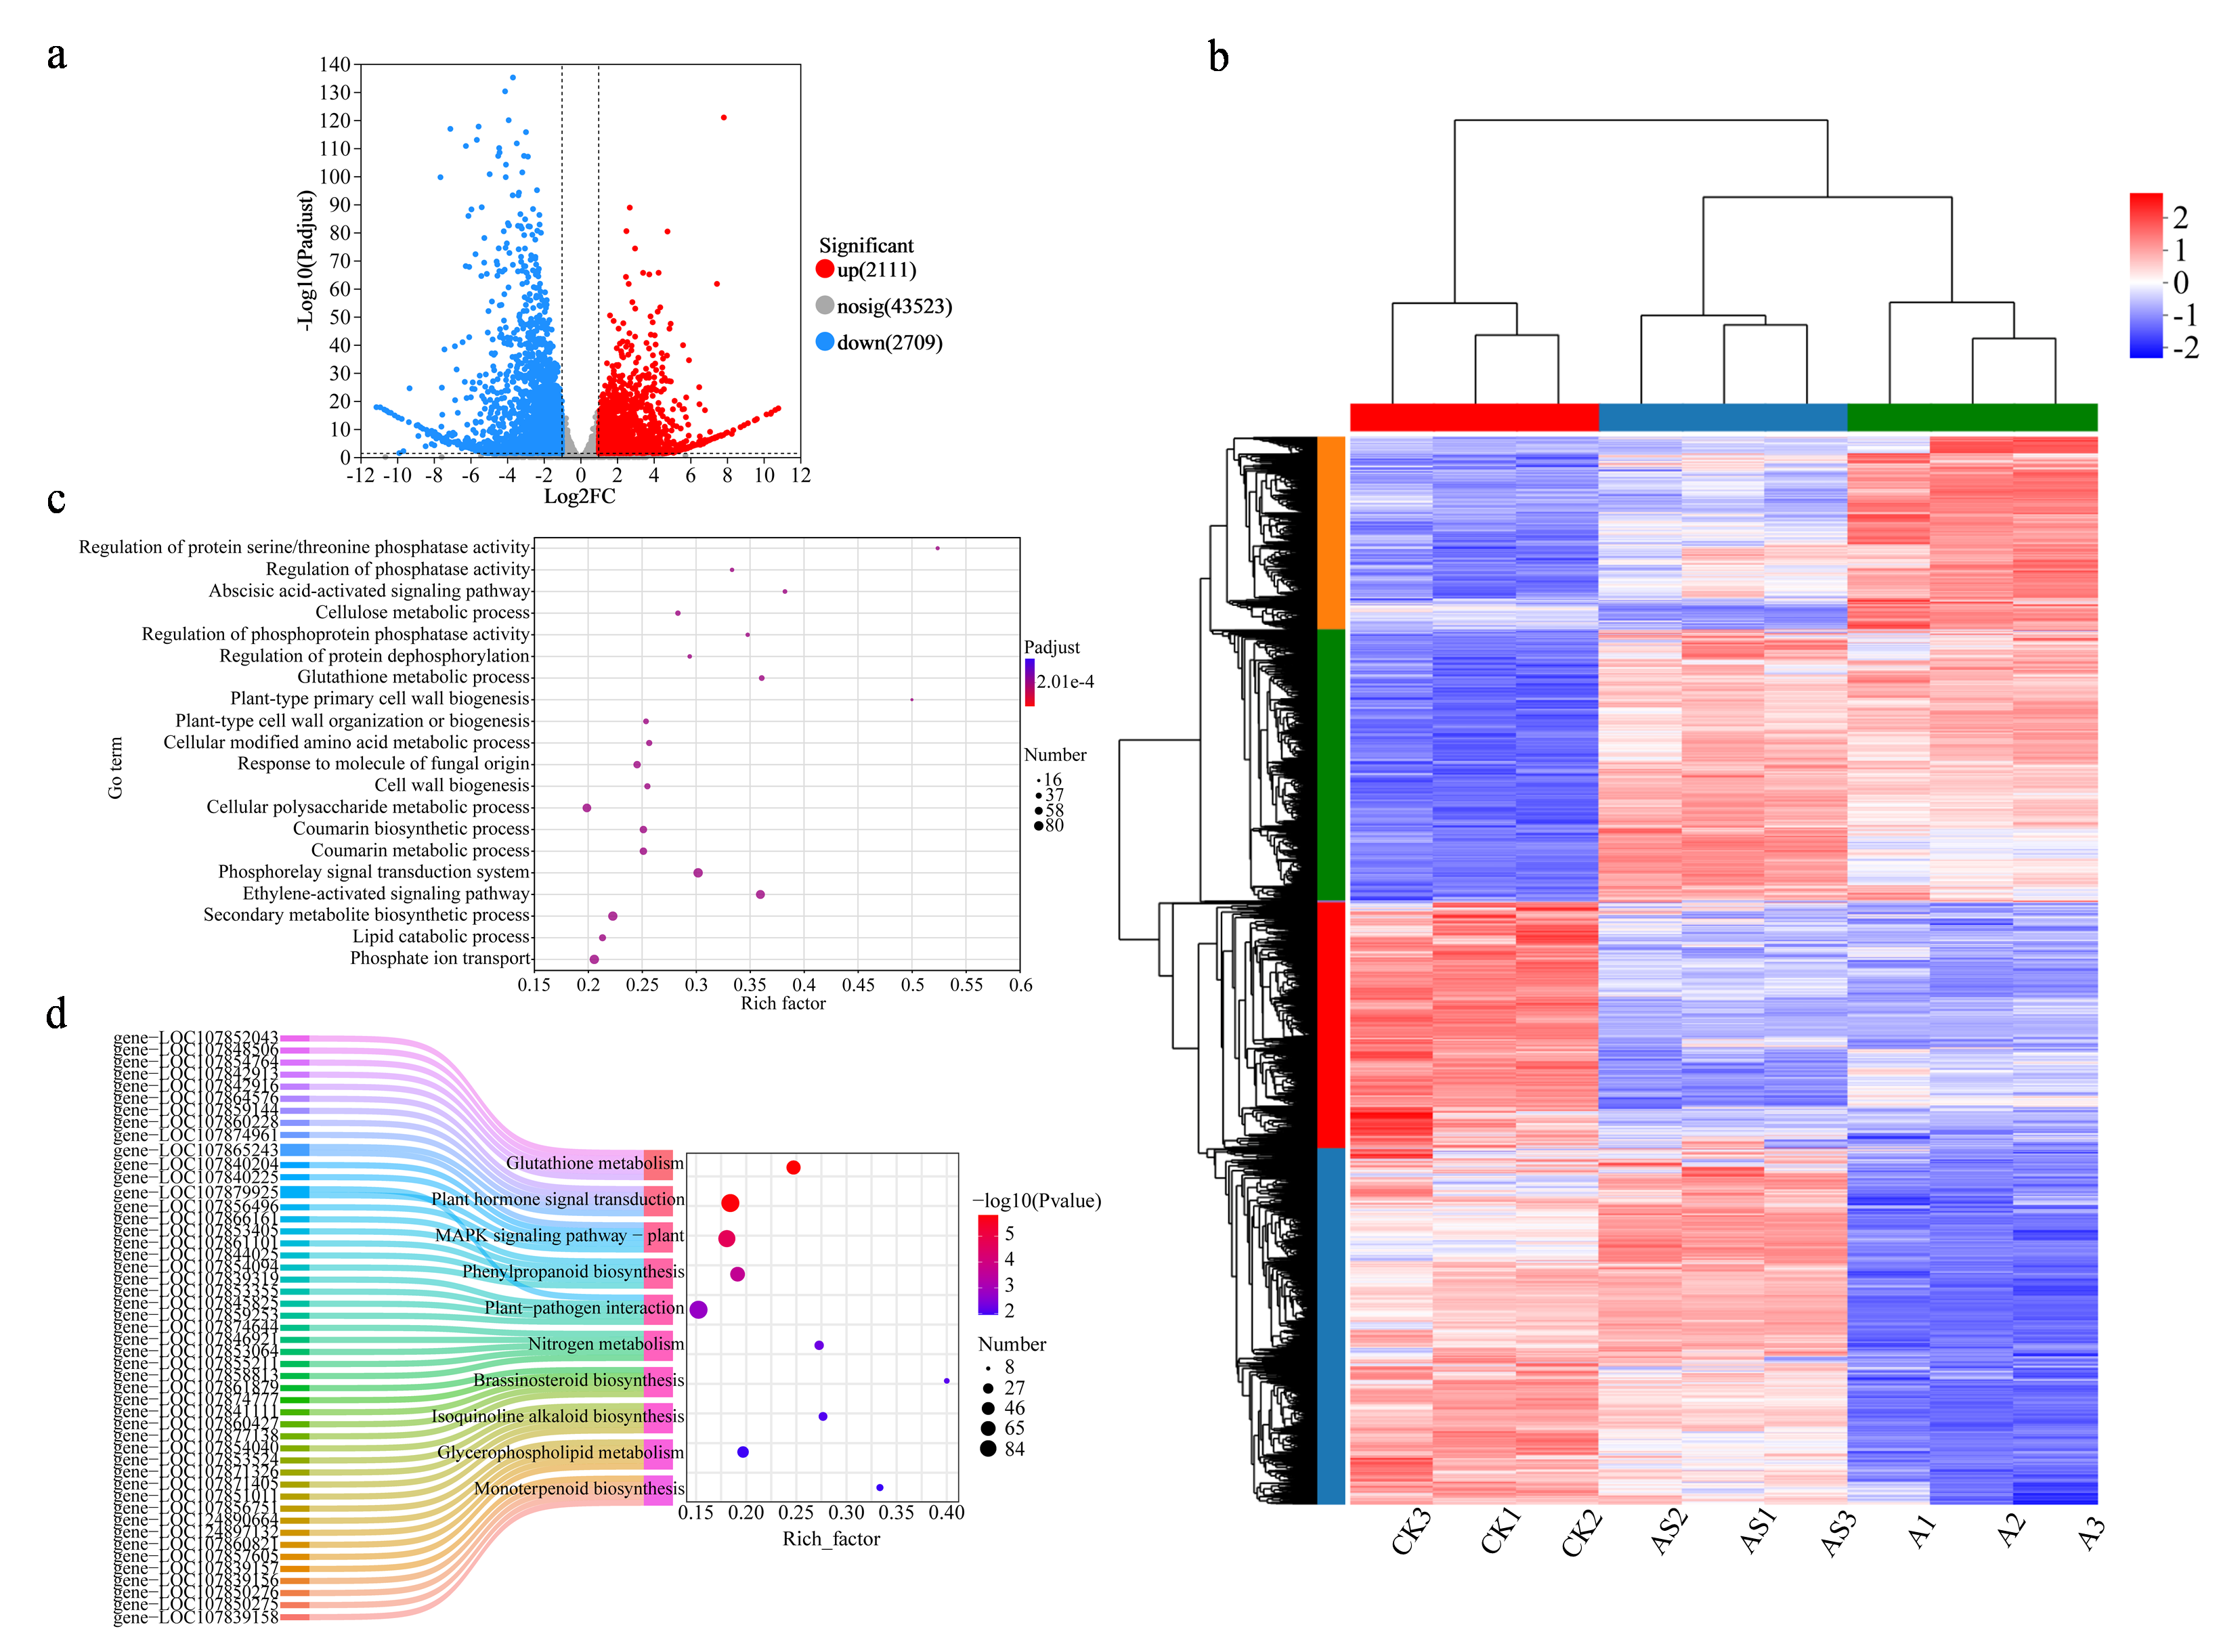


Fig. S10 (a) Volcano plot analysis of differentially expressed genes between the control treatment and the treatment with *A. azotica* alone. (b) Cluster heatmap of differentially expressed genes between the control treatment and different microalgae treatments. (c) GO and (d) KEGG enrichment analyses of differentially expressed genes between the control treatment and the treatment with *A. azotica* alone. The sample size for all treatments in the figure was 3. In figure (a), each point represented a specific gene, with red points indicating significantly upregulated genes, green points indicating significantly downregulated genes, and gray points representing non-significant genes. In figure (b), green represented downregulation, red represented upregulation, and the color intensity indicated the degree of change relative to the control group. In figure (c), the size of the points represented the number of genes/transcripts in the GO term, and the color of the points corresponded to different Padjust ranges (only the top 20 enriched results are shown). In figure (d), the size of the points represented the number of genes in the pathway, and the color of the points corresponded to different Padjust ranges (only the top 20 enriched results are shown).

The A and AS application had no significant effect on α-diversity of prokaryotic and eukaryotic microbial communities in the rhizosphere soil (Fig. S11).


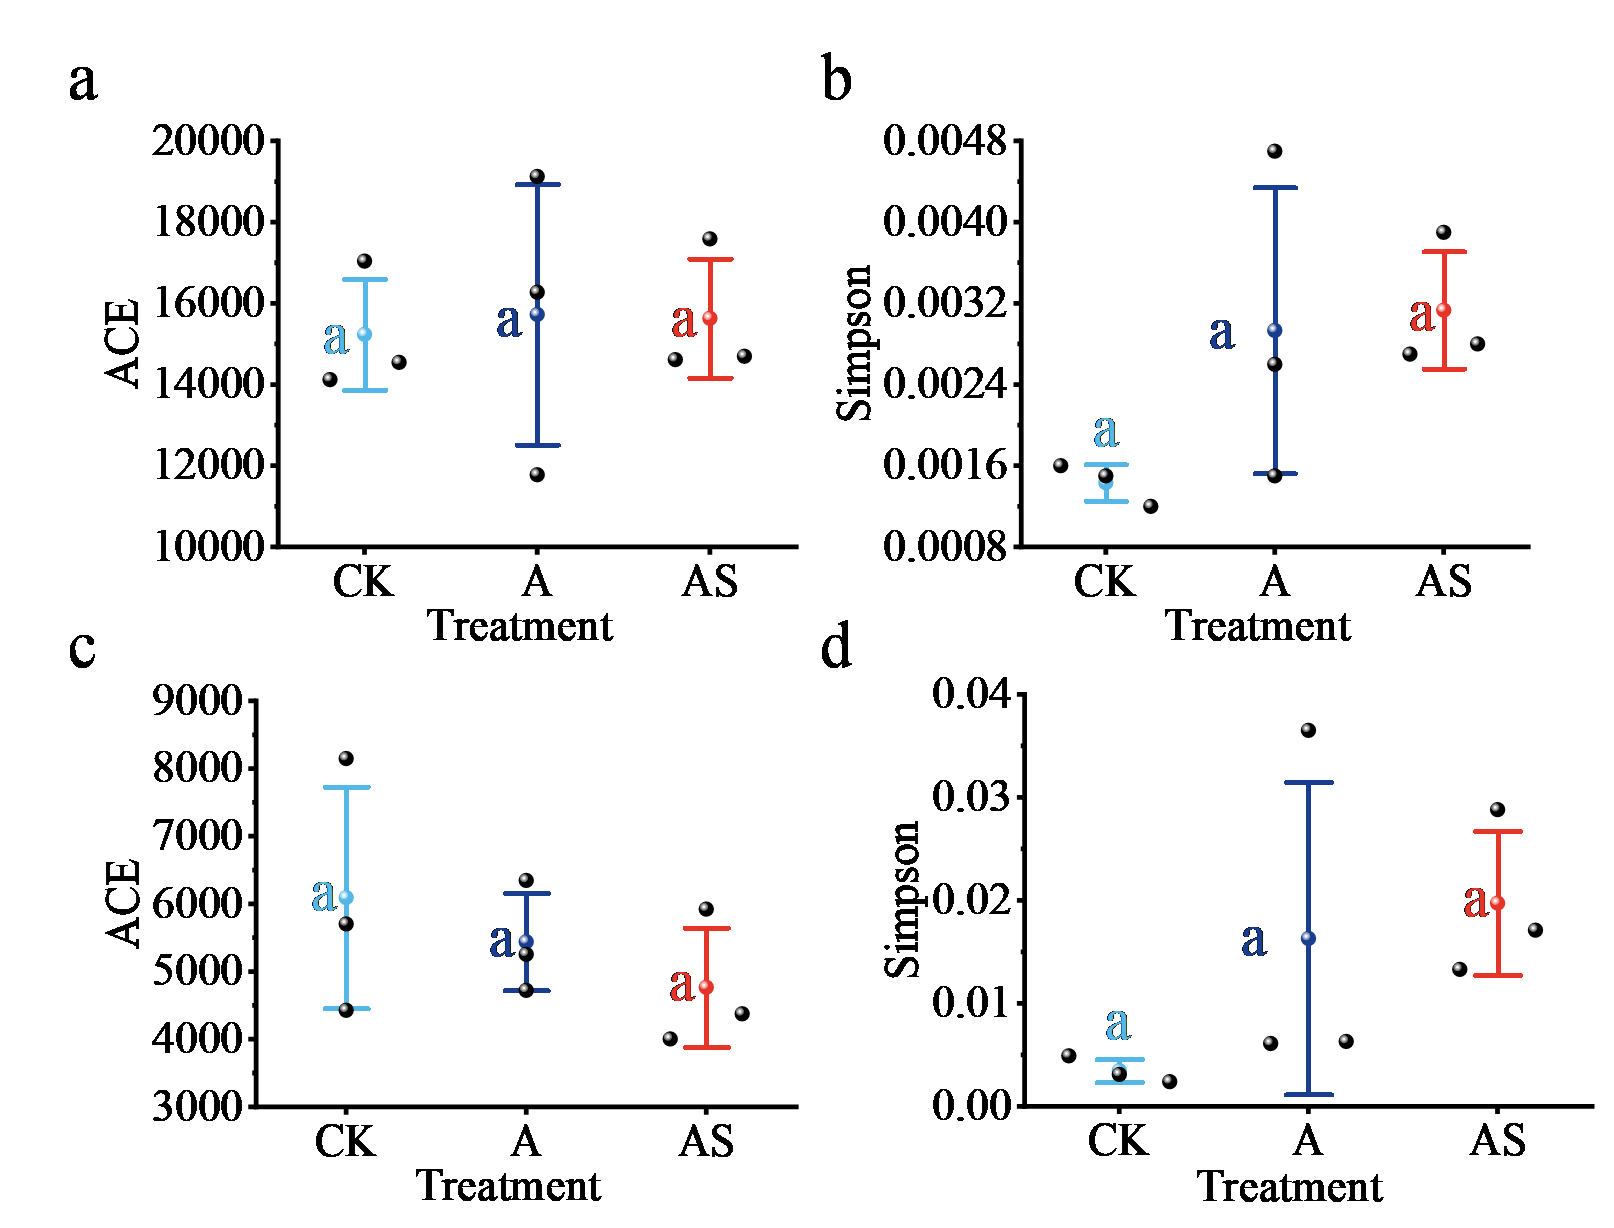


Fig. S11 The effects on the alpha diversity of microbial communities in pepper rhizosphere soil. (a) ACE index and (b) Simpson index of prokaryotic microorganisms in pepper rhizosphere soil under the control treatment and different microalgae treatments. (c) ACE index and (d) Simpson index of eukaryotic microorganisms in pepper rhizosphere soil under the control treatment and different microalgae treatments. The sample size for all treatments in the figure was 6. Different letters indicated significant differences at *P* < 0.05 (one-way ANOVA corrected by Duncan's test).

Both A and AS application altered the community structures of prokaryotic and eukaryotic microorganisms (Fig. 3a and Fig. S12a). For eukaryotes, *Halobiotus* was the dominant genus exclusively in the AS application, with a relative abundance of 6.23% (Fig. S12b). The A application increased the relative abundances of *Polymyxa*, *Chlorosarcinopsis*, and *Heterochlamydomonas* by 527.75%, 51.10%, and 419.35%, respectively (*P* < 0.05). The AS application decreased the relative abundance of *Hyphochytrium* by 61.69% (*P* < 0.05). The STAMP analysis showed that the A application significantly increased the relative abundances of *Polymyxa* and *Heterochlamydomonas* (*P* < 0.05; Fig. S12c), and the AS application significantly increased the relative abundance of *Halobiotus* (*P* < 0.05). For eukaryotic microorganisms, the AS application significantly enriched *Palmellopsis* and *Scenedesmus* (Fig. S12d). the AS application promoted prokaryotic microorganisms *Microcoleus* and *Gemmatimonas* and eukaryotic microorganisms *Heterochlamydomonas*, *Amphisiella*, and *Filamoeba*, establishing them as core microorganisms (Fig. S12e).


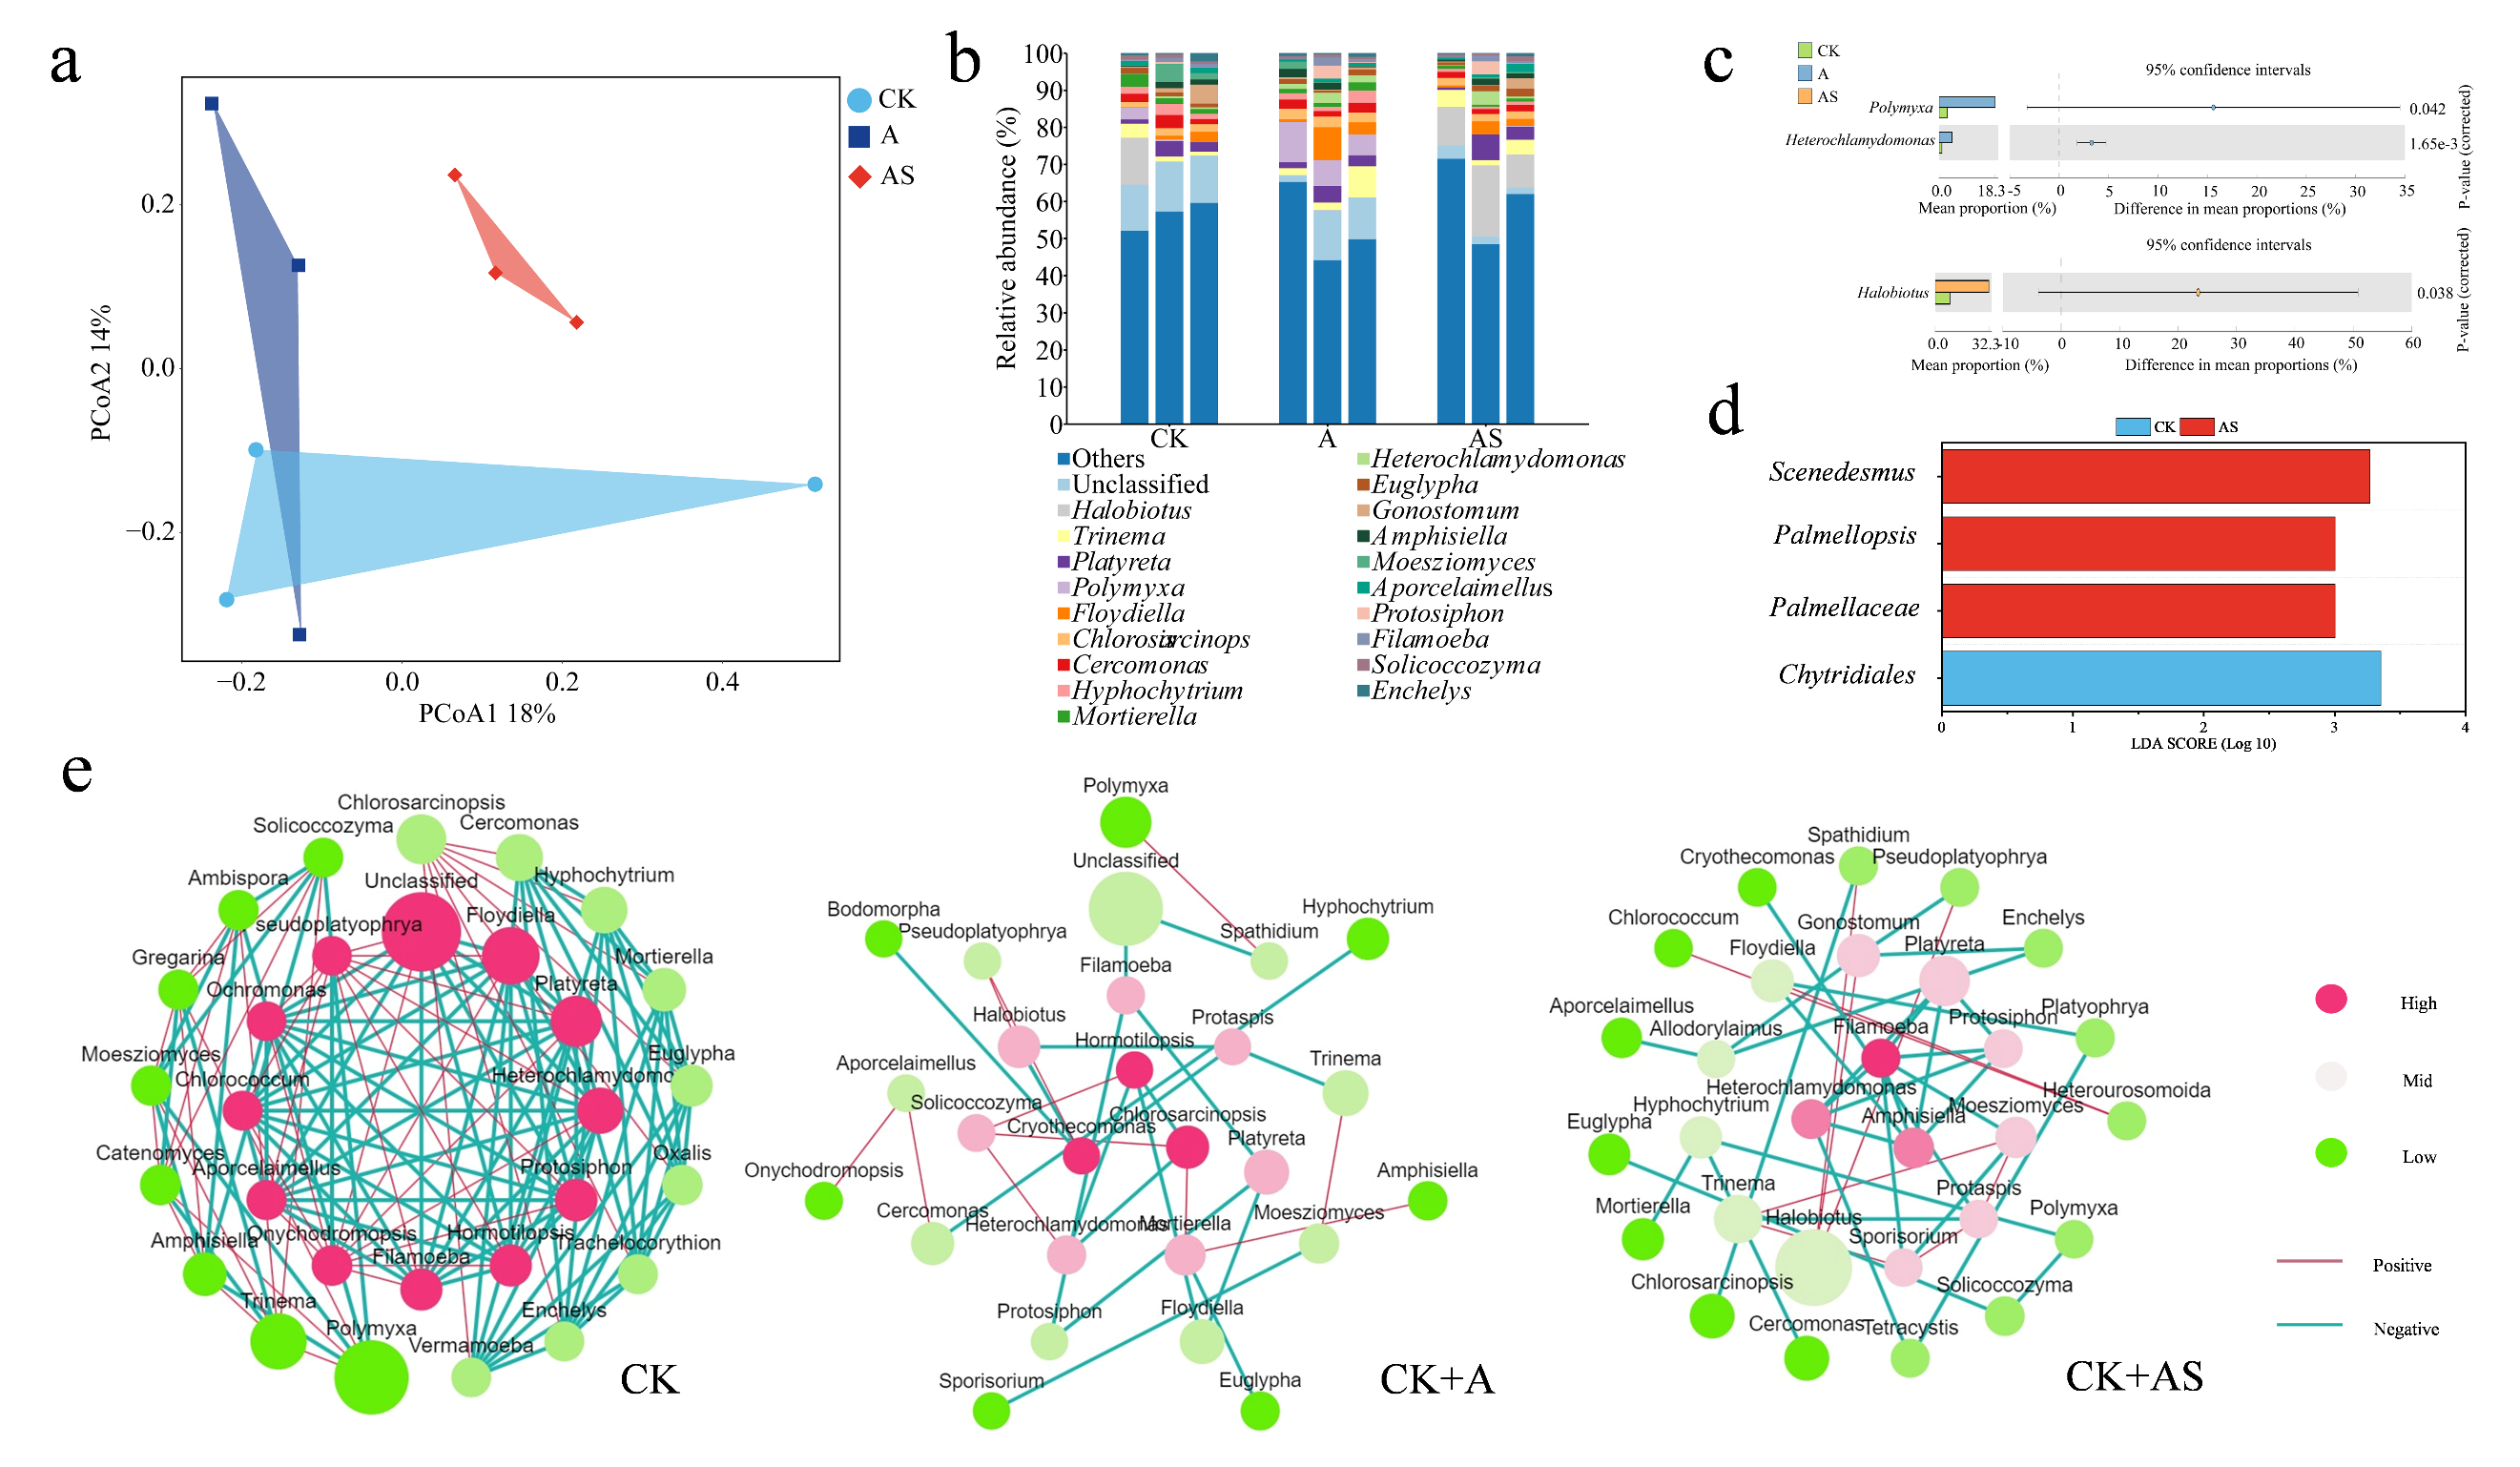


Fig. S12 The effect of microalgae on the structure of eukaryotic microbial communities in the rhizosphere soil of pepper. (a) Principal Coordinate Analysis (PCoA) of the Bray-Curtis dissimilarity matrix (OTU level) for eukaryotic microorganisms in rhizosphere soil under the control treatment and different microalgae treatments. (b) Relative abundance percentages of the top 20 most abundant genera of eukaryotic microorganisms in rhizosphere soil under the control treatment and different microalgae treatments. (c) Statistical Analysis of Metagenomic Profiles (STAMP) analysis of the top 20 most abundant genera of eukaryotic microorganisms in rhizosphere soil under the control treatment and different microalgae treatments. (d) Linear Discriminant Analysis Effect Size (LEfSe) analysis of eukaryotic microorganisms (genus level) in rhizosphere soil under the control treatment and different microalgae treatments. (e) Core microbial network analysis of the top 20 most abundant genera of eukaryotic microorganisms in rhizosphere soil under the control treatment and different microalgae treatments. The sample size for all treatments in the figure was 3. In figure (a), the colored shapes and triangles represented the OTUs of prokaryotic microorganisms in the rhizosphere soil of pepper. In figure (c), the P-values were calculated using a t-test, with a significance threshold of *P* < 0.05 and a confidence interval of 95%. Groups with significantly different microbial features are represented by different colors. In figure (d), the Kruskal-Wallis test was used to calculate P-values, with a significance threshold of *P* < 0.05 and LDA ≥ 3. In figure (e): CK represented the core microbial network analysis of the top 20 most abundant genera of prokaryotic microorganisms in the rhizosphere soil of the control treatment; CK+A represented the core microbial network analysis of the top 20 most abundant genera of prokaryotic microorganisms in the rhizosphere soil of the control treatment and the treatment with *A. azotica* alone; CK+AS represented the core microbial network analysis of the top 20 most abundant genera of prokaryotic microorganisms in the rhizosphere soil of the control treatment and the treatment with the combined application of *A. azotica* and *Scenedesmus* sp.. The size of the nodes indicated absolute abundance, and the color of the nodes represents degree. Red lines indicated positive correlations, while green lines indicated negative correlations. The network structure pattern was concentric, and the connection mode was haystack.

Co-occurrence network analysis showed that the A and AS application reduced the network diameter and average path length, increased the average clustering coefficient, and enhanced community stability. The AS application increased the modularity of co-occurrence network, in which microorganisms with higher degree values were located in highly interconnected modules and thereby exhibited stronger resistance to external disturbances


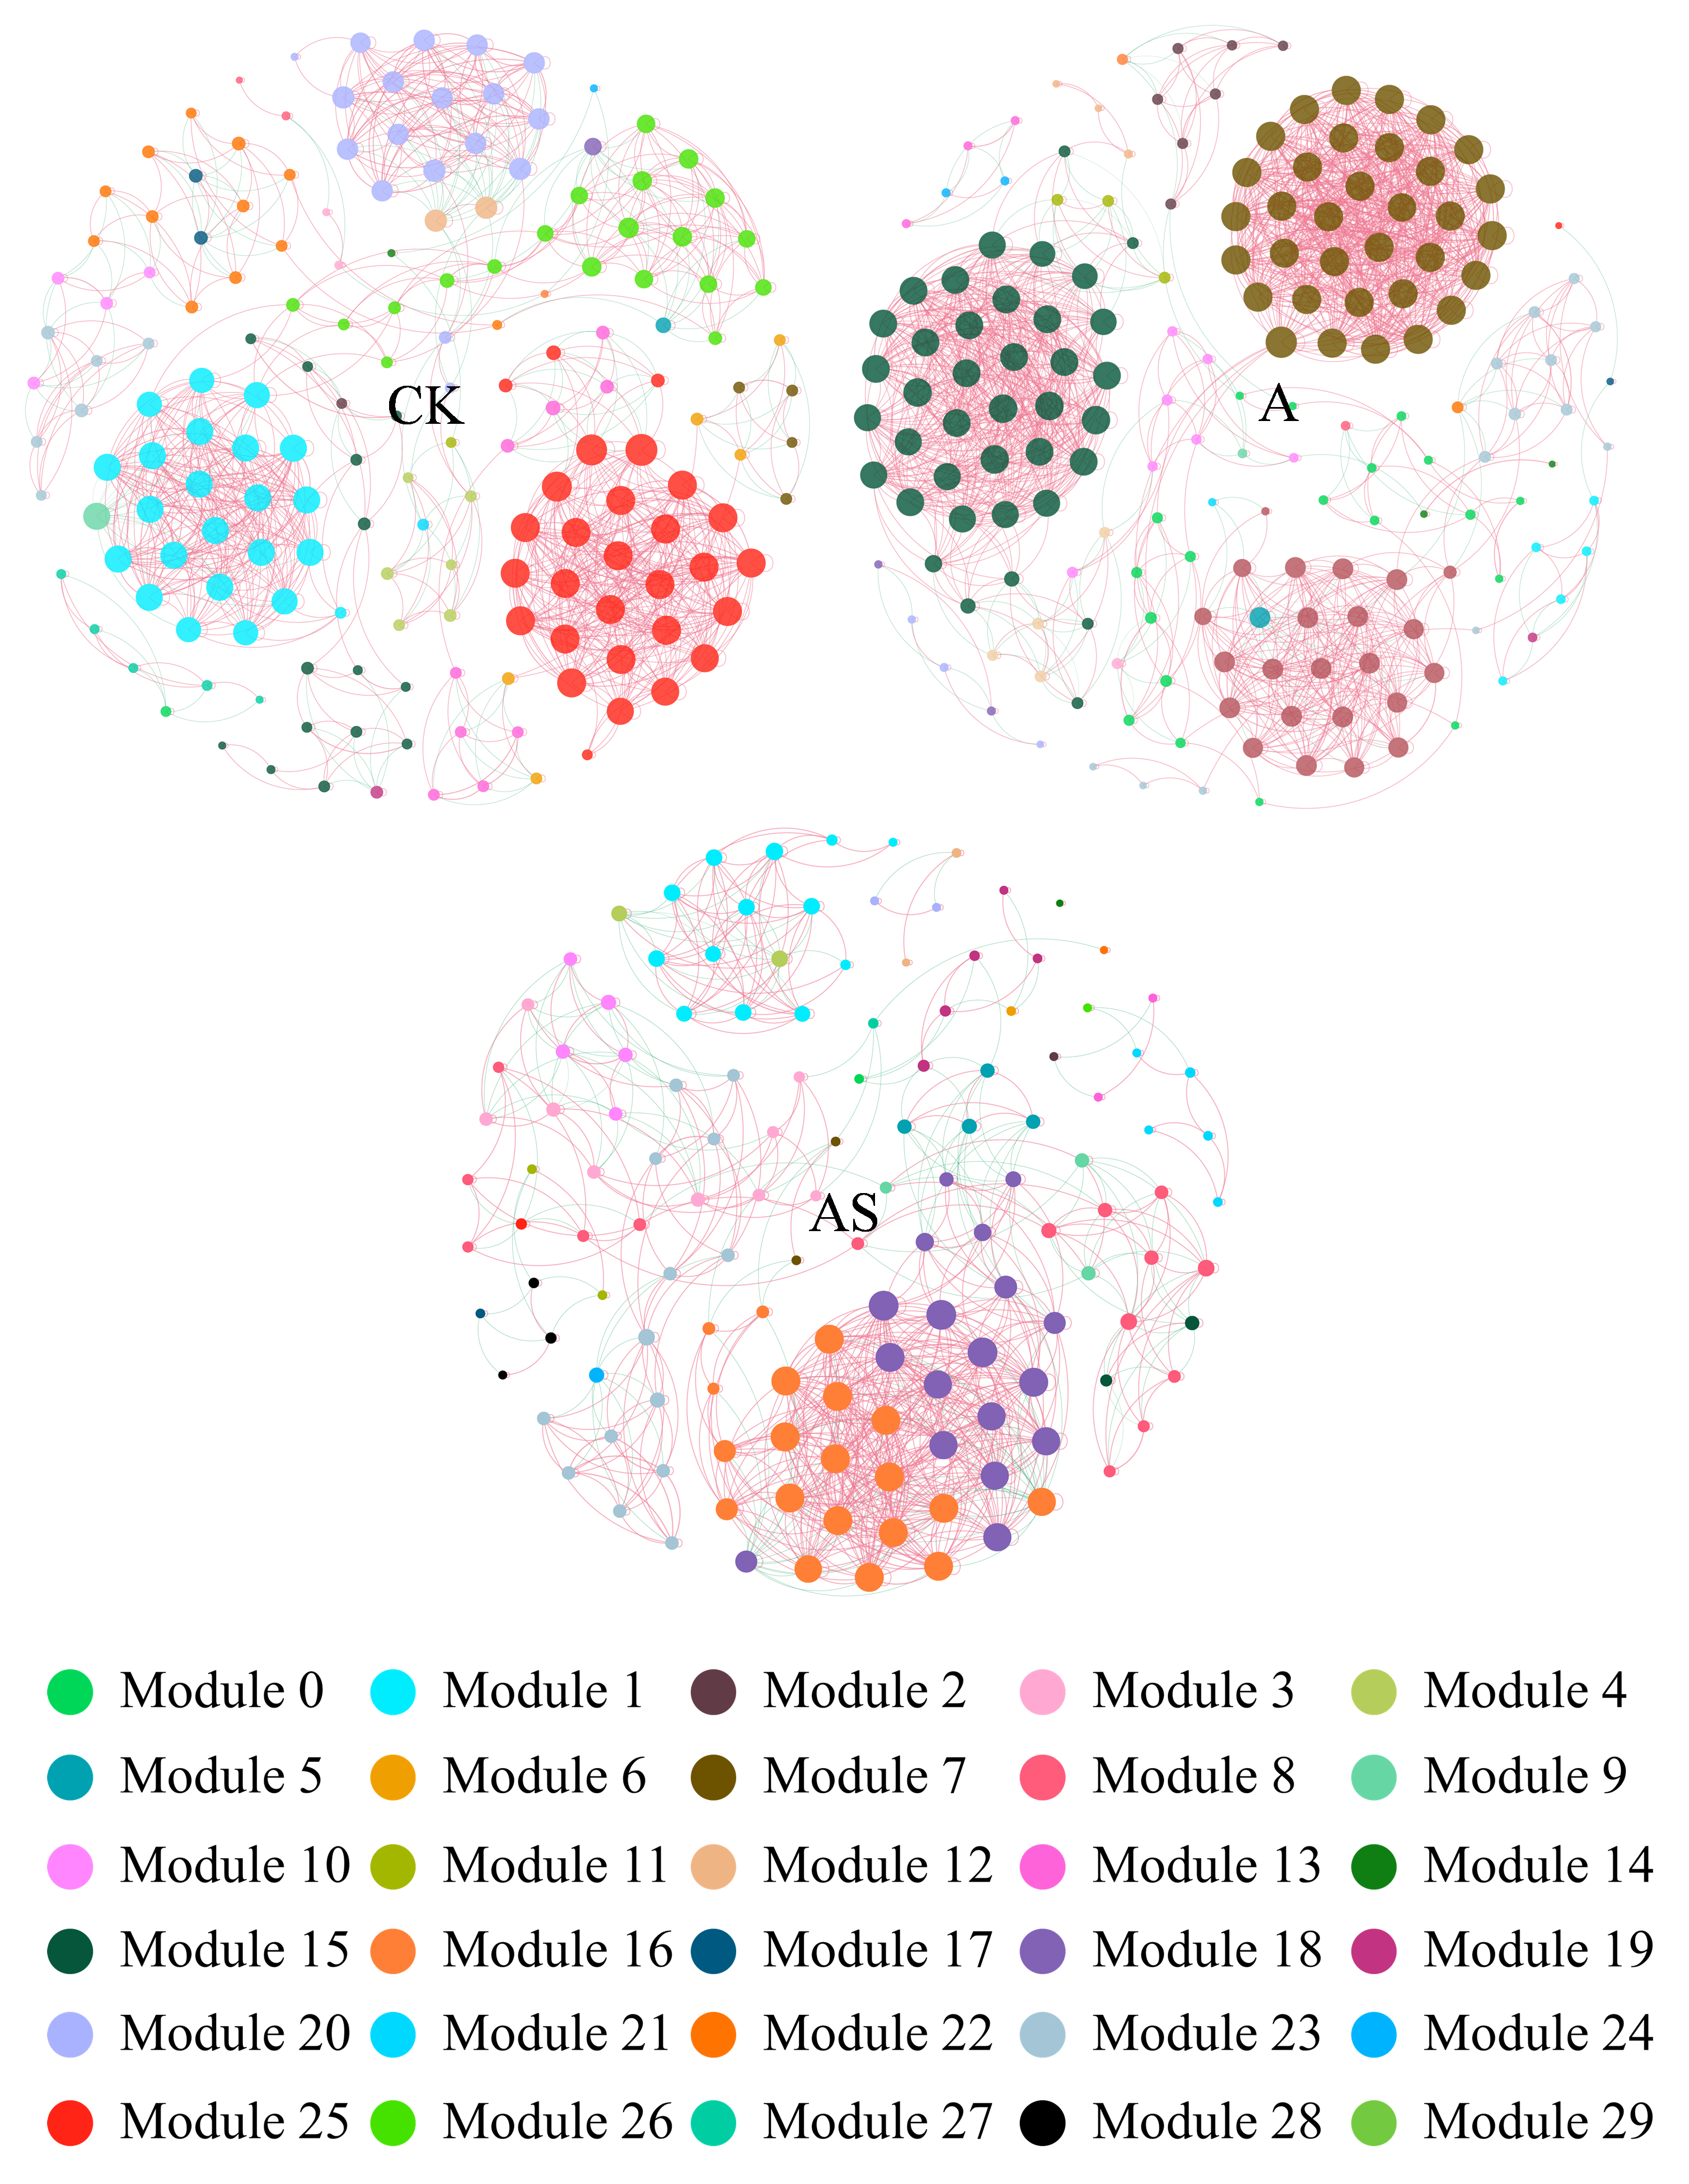


Fig. S13 Co-occurrence network analysis at the OTU level. The network graph was constructed using OTUs that met the criteria of r < -0.6 or r > 0.6 and *P* < 0.001 based on Spearman correlation analysis. Node colors were defined by modularity, and node sizes were determined by degree. Red lines indicated positive correlations between microorganisms, while green lines indicated negative correlations between microorganisms.

The 16S rRNA sequencing analysis showed that the A application significantly increased the OTU number and relative abundance of bacteria involved in the nitrate reduction, whereas the AS application significantly increased the OTU number and relative abundance of bacteria involved in nitrogen fixation.


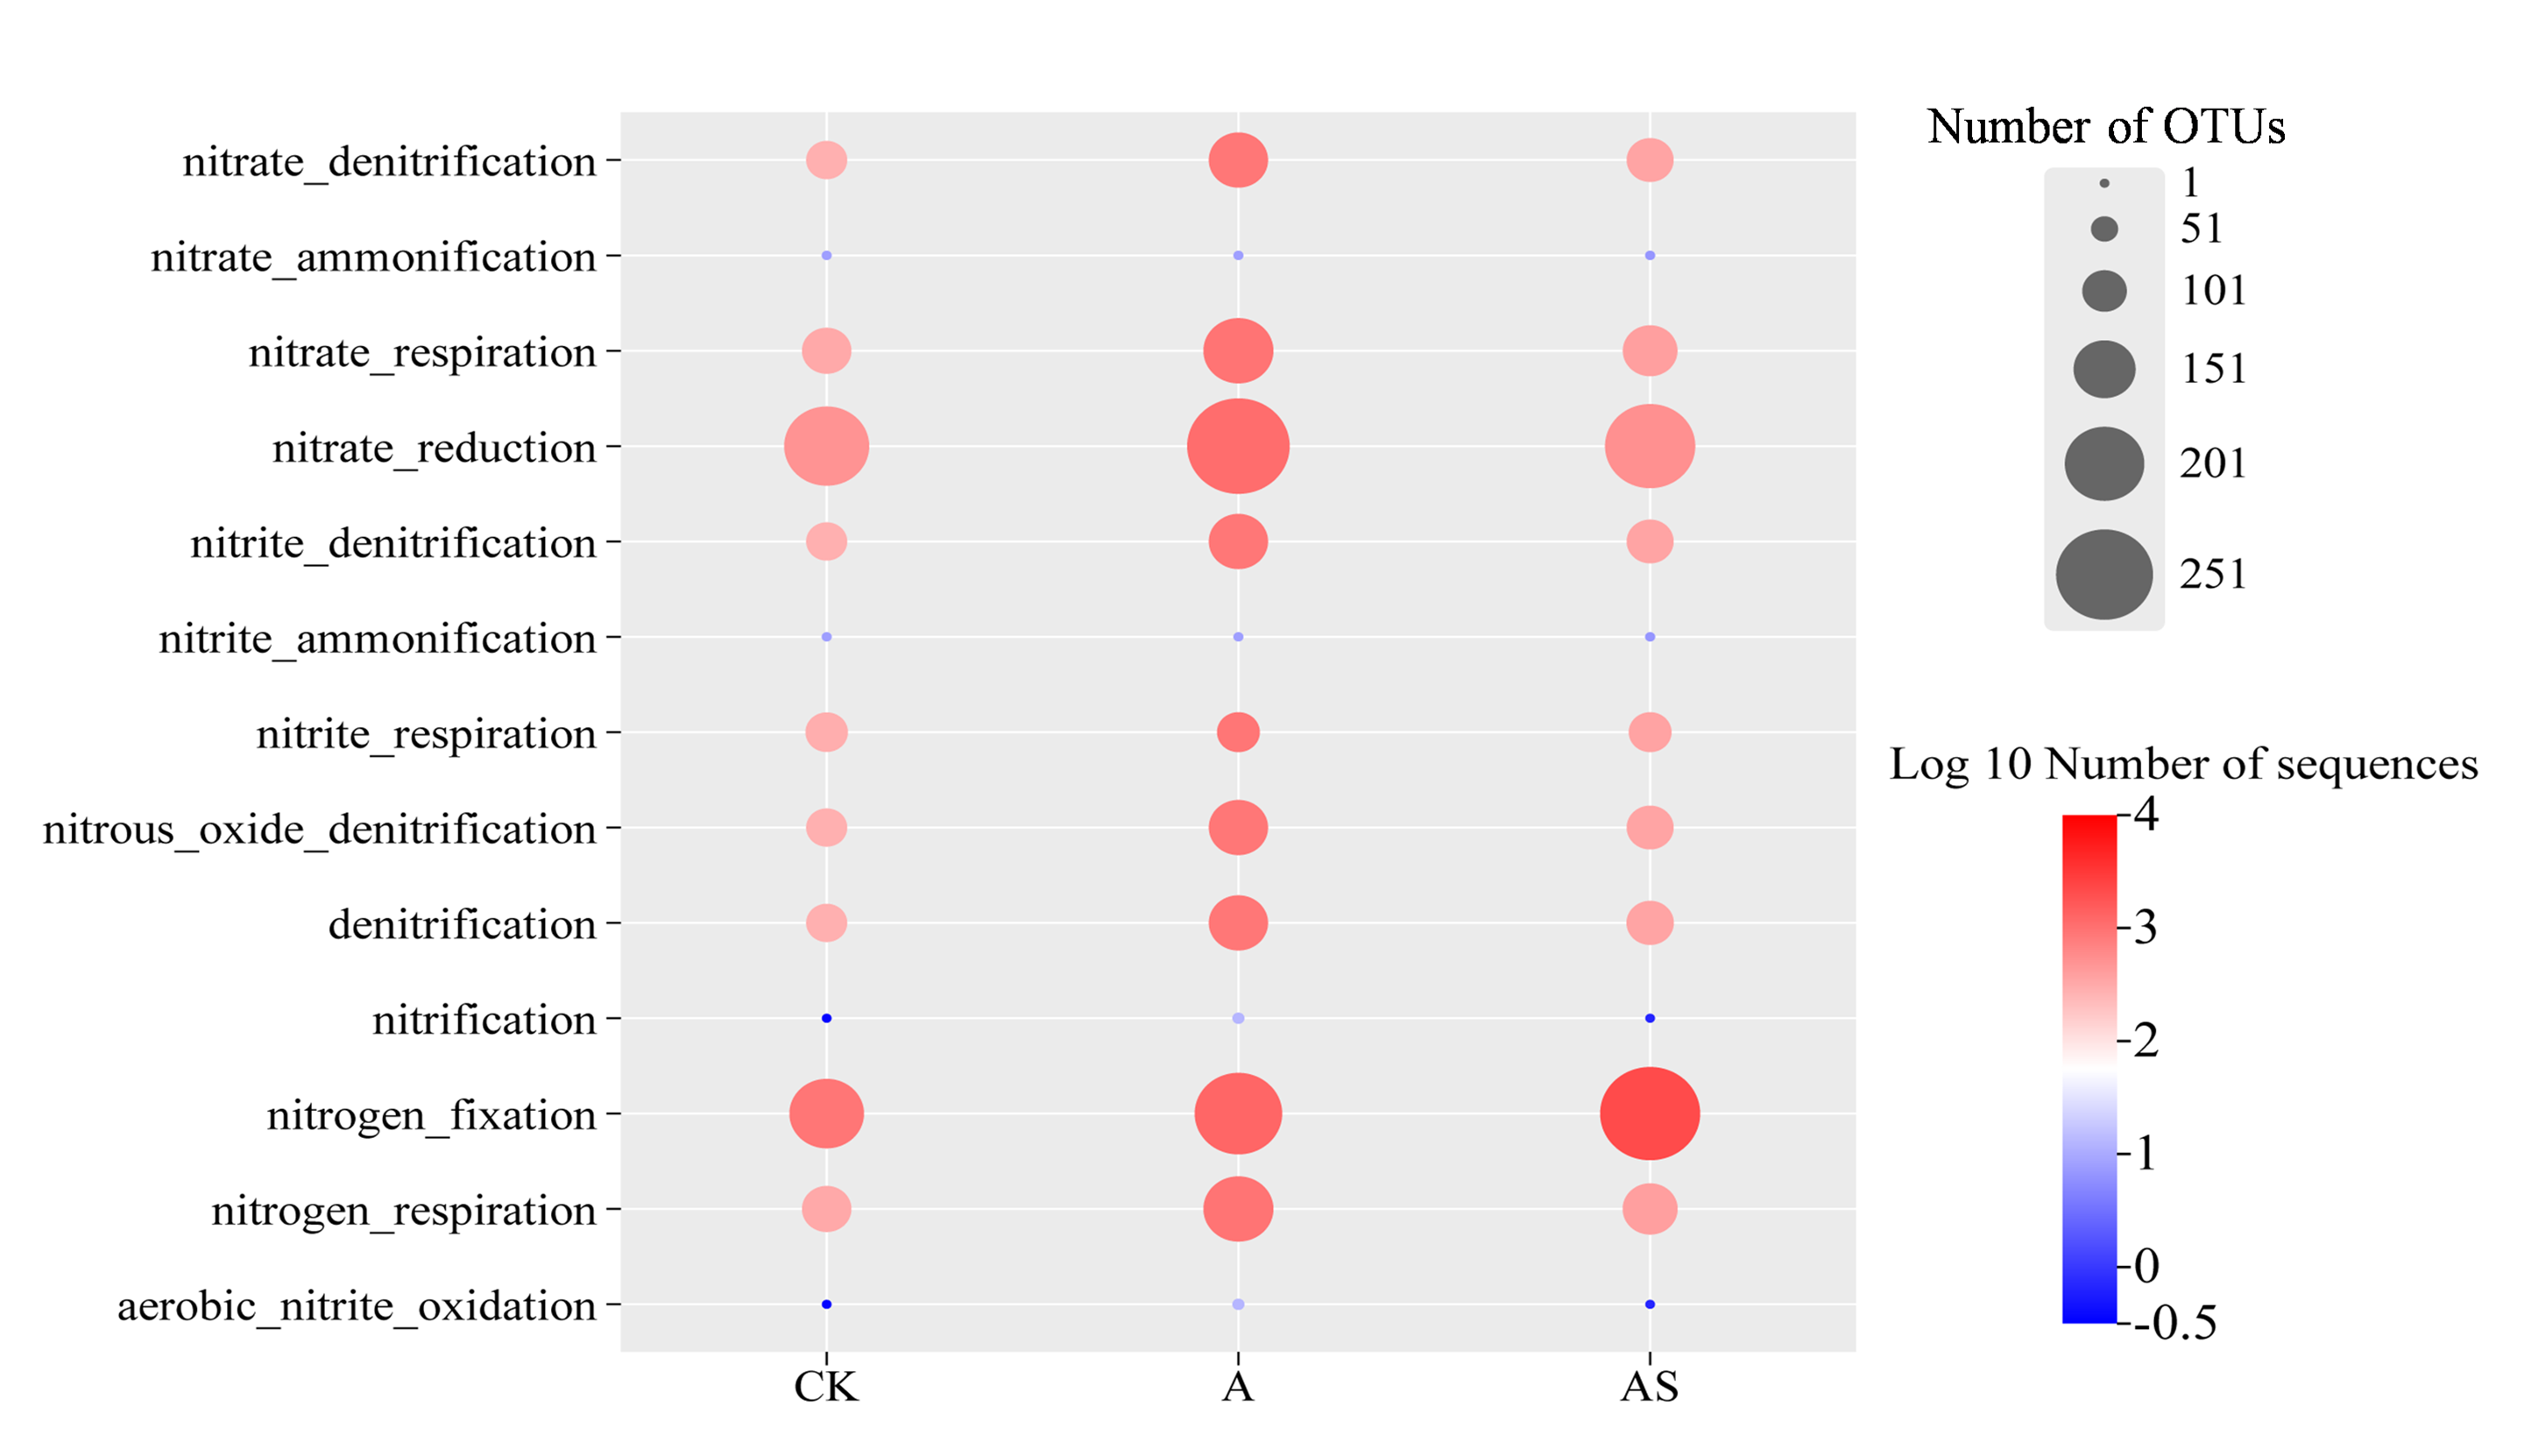


Fig. S14 Changes in the relative abundance of nitrogen cycling microorganisms in pepper rhizosphere soil under the control treatment and different microalgae treatments.

Three nitrogen-fixing bacteria were isolated from the rhizosphere soil after AS application and identified as *Methylobacterium* sp. (MS), *Bradyrhizobium japonicum* (BJ), and *Sphingomonas* sp. (SS; Fig. S15).


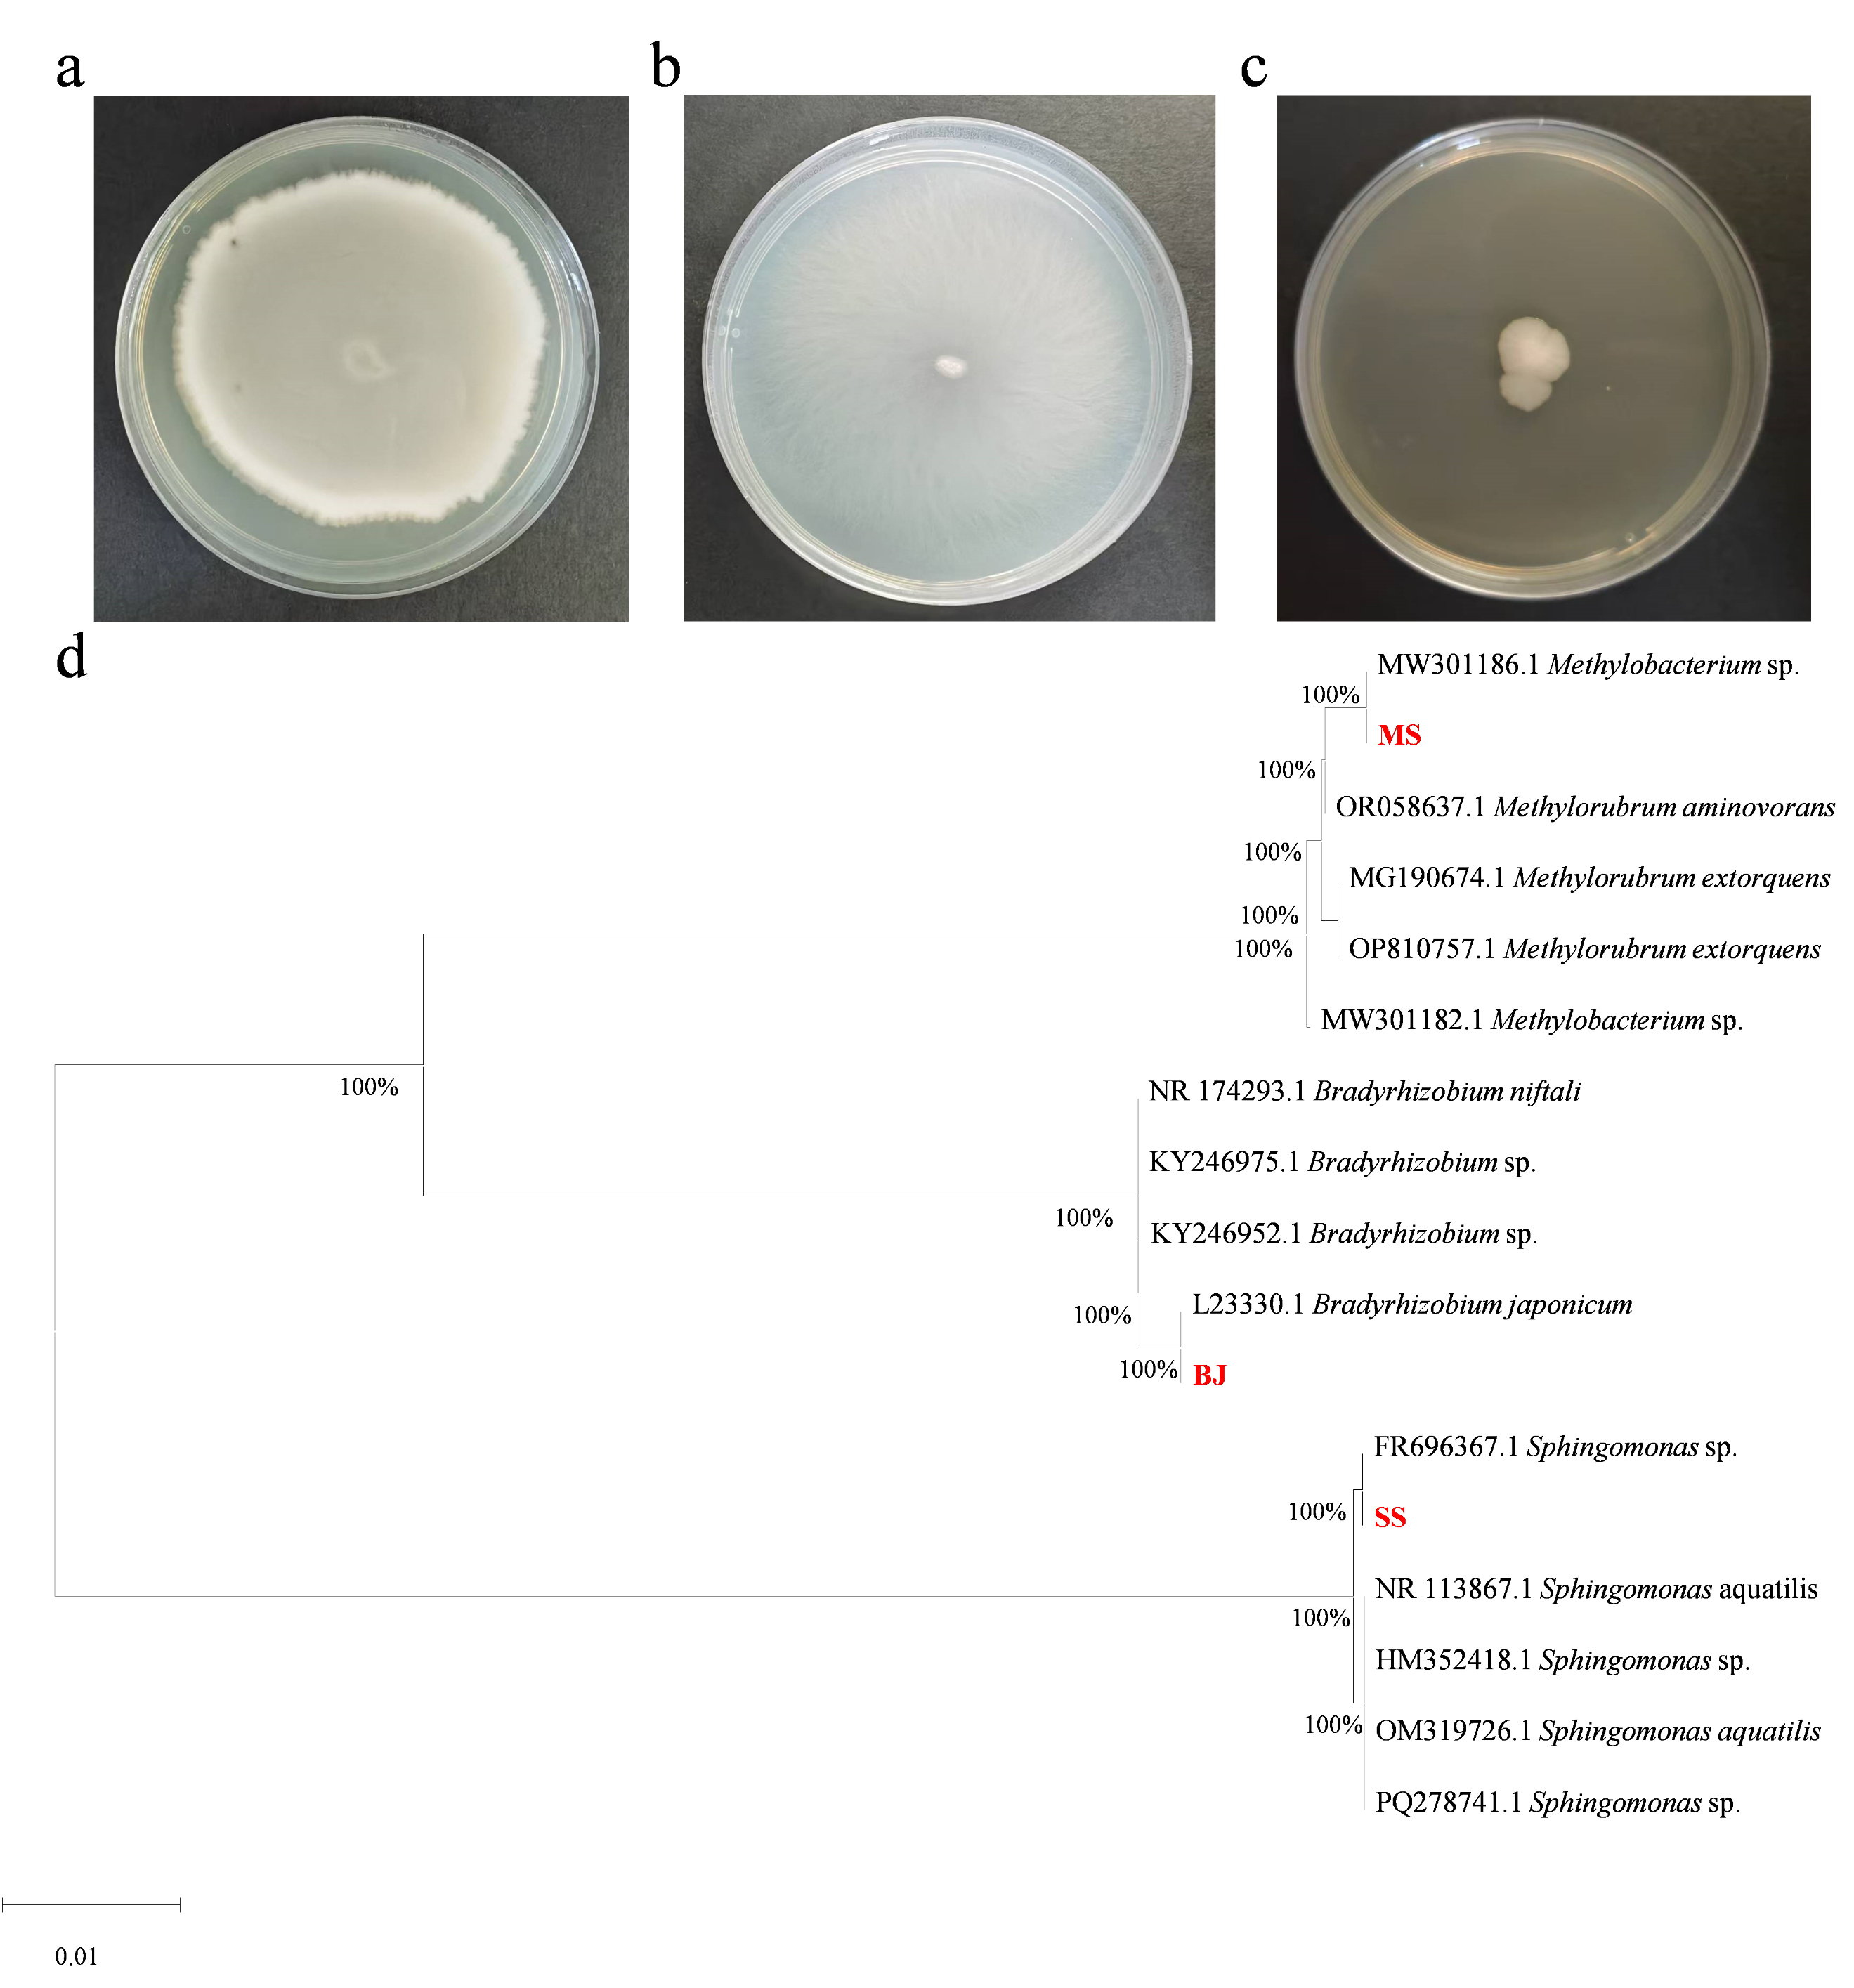


Fig. S15. Morphological images of (a) *Methylobacterium* sp., (b) *Bradyrhizobium japonicum*, and (c) *Sphingomonas* sp. isolated and purified from pepper rhizosphere soil in the treatment with the combined application of *A. azotica* and *Scenedesmus* sp.. (D) Phylogenetic tree of nitrogen-fixing bacteria isolated and purified from pepper rhizosphere soil in the treatment with the combined application of *A. azotica* and *Scenedesmus* sp.. MS, BJ, and SS represented *Methylobacterium* sp., *B. japonicum*, and *Sphingomonas* sp., respectively.

Pot experiments showed that the A application increased plant height, stem diameter, leaf length, and leaf width of peppers by 19.34%, 9.66%, 26.14%, and 23.08%, respectively (*P* < 0.05). The AS application increased plant height, stem diameter, leaf length, and leaf width of peppers by 71.70%, 37.28%, 71.59%, and 59.61%, respectively (*P* < 0.05). By contrast, the combined application of *Scenedesmus* sp. and three nitrogen-fixing bacteria increased plant height, stem diameter, leaf length, and leaf width by 117.45%, 52.27%, 111.36%, and 115.38%, displaying the strongest growth-promoting effects (*P* < 0.05).


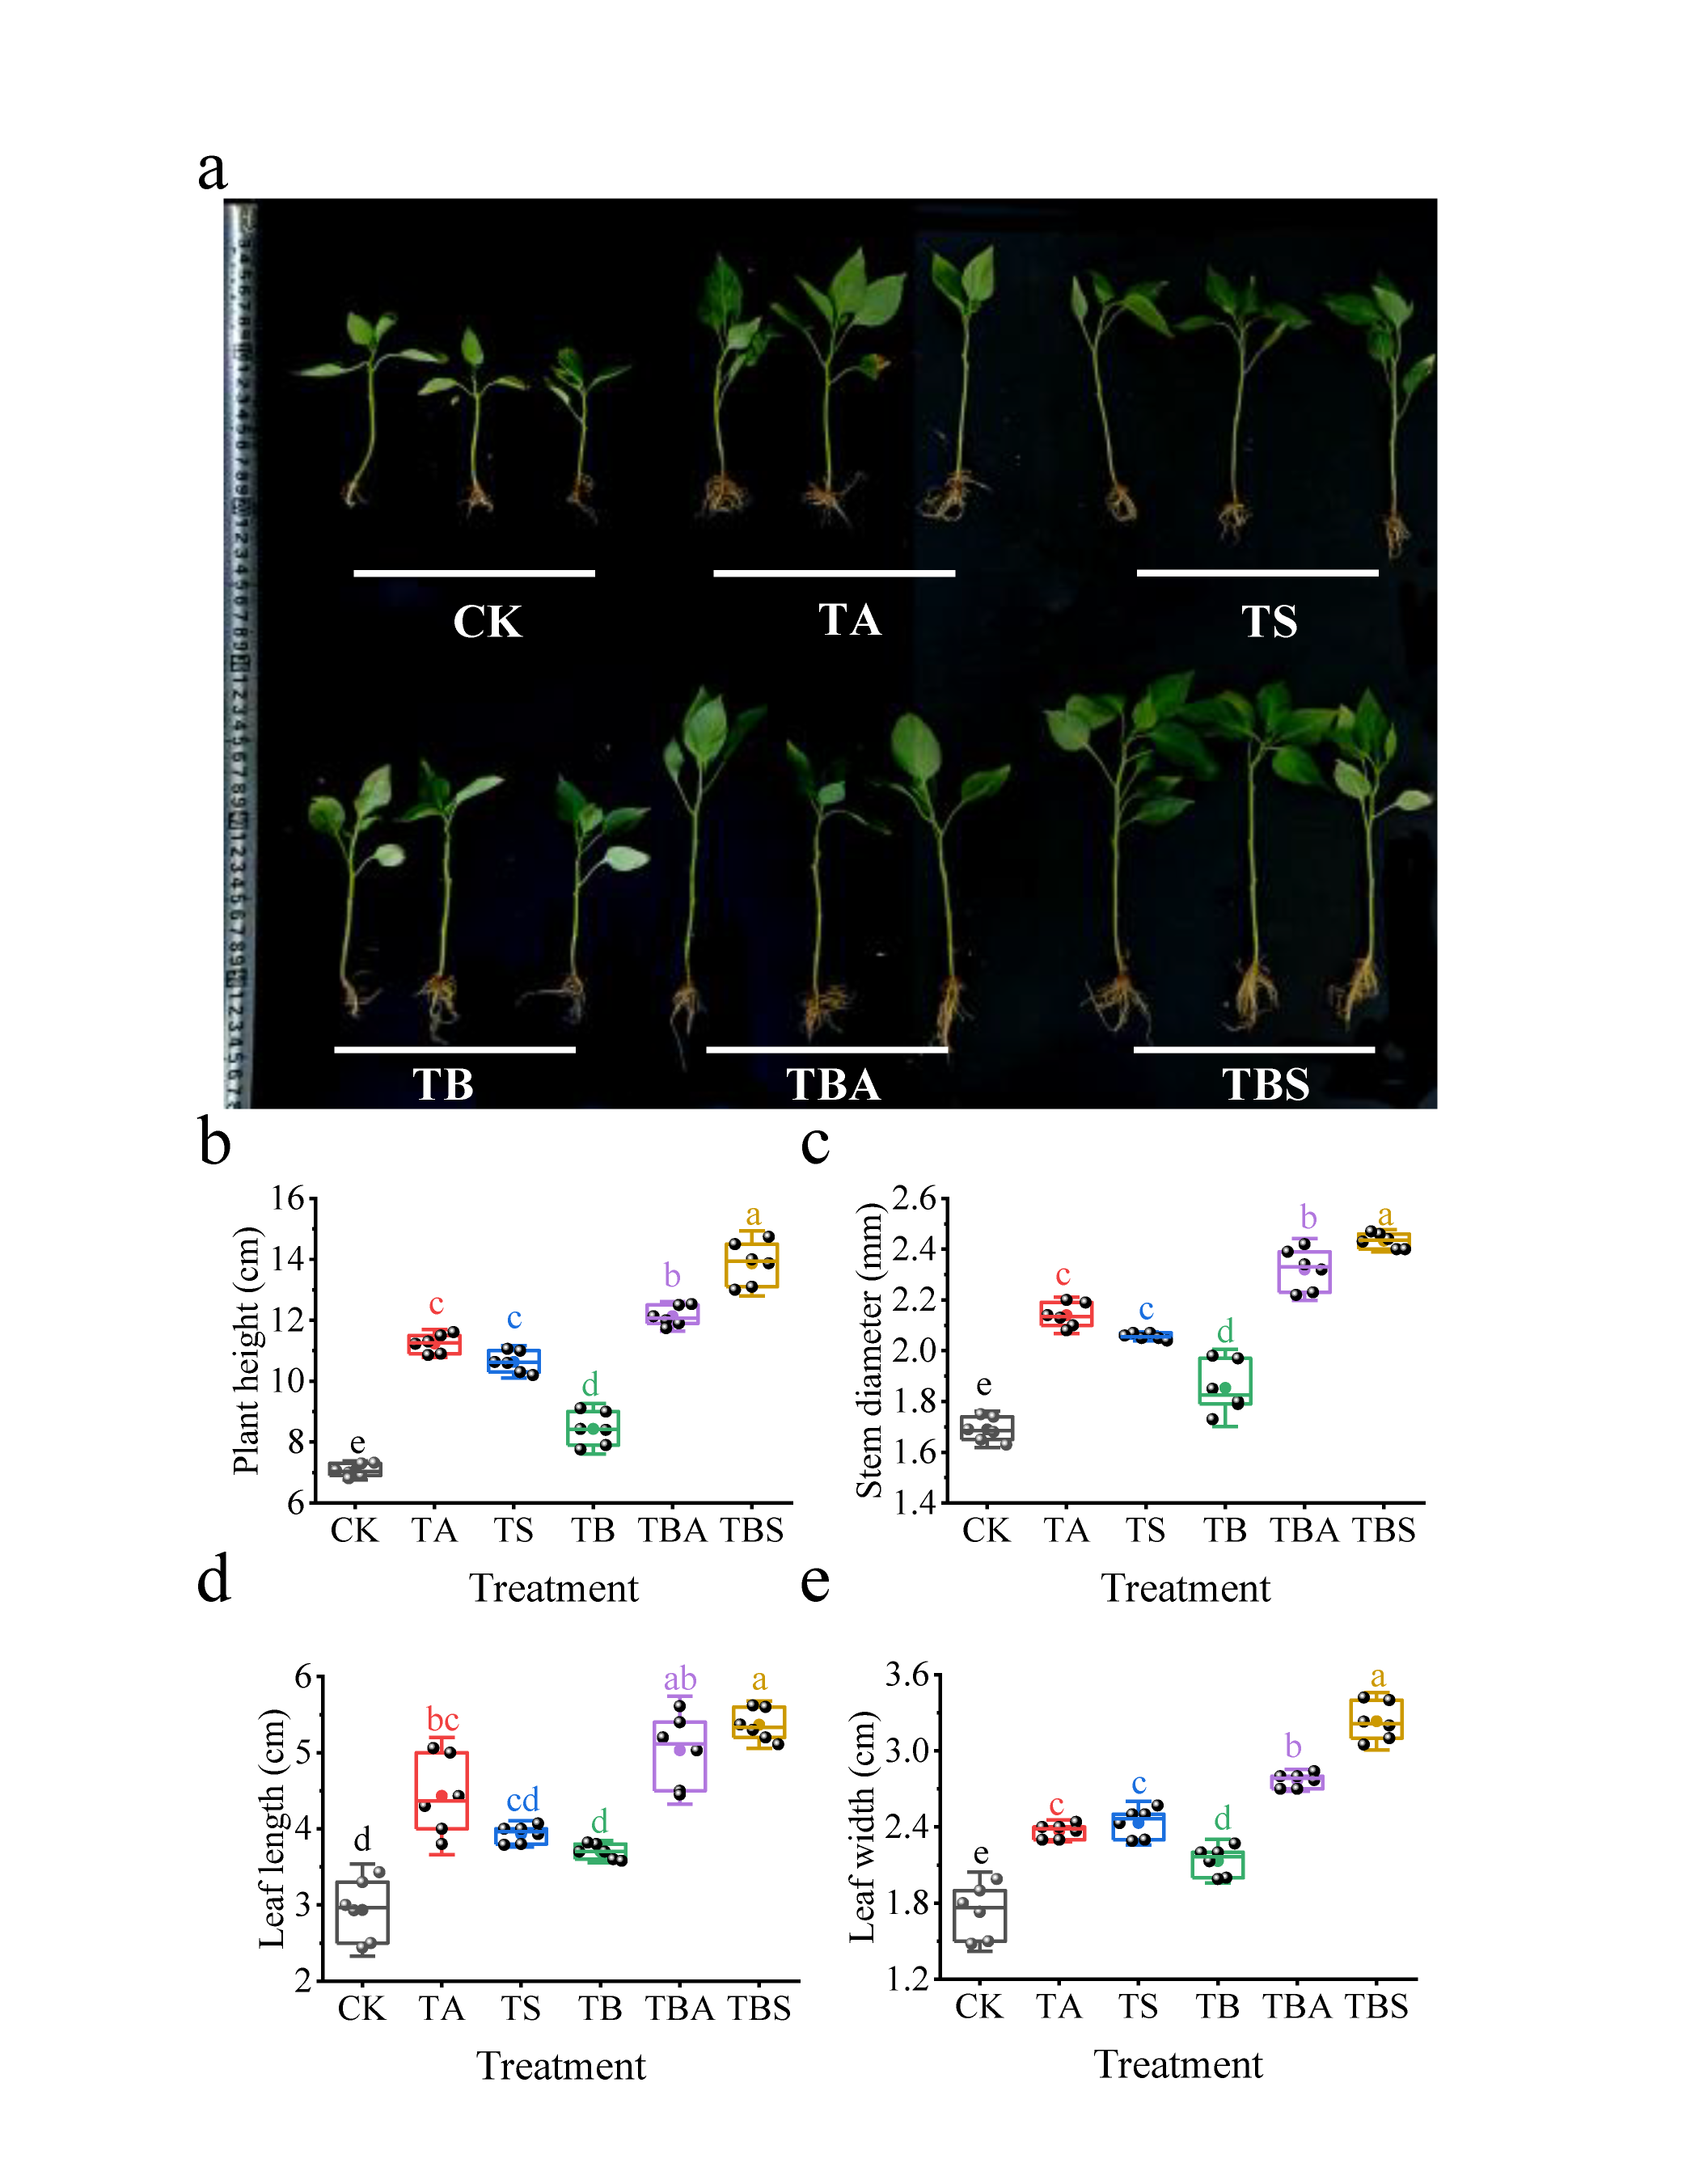


Fig. S16 Effects of combined application of different microalgae and nitrogen-fixing bacteria on pepper growth. (a) Pepper plants under different treatments. (b) Plant height, (c) stem diameter, (d) leaf length, and (e) leaf widthof peppers under different treatments. The sample size for all treatments in the figures was 6. In figures (b-e), different letters indicated significant differences at *P* < 0.05 (one-way ANOVA corrected by Duncan's test).

The filtrate and EPS of *A. azotica* and the filtrate of *Scenedesmus* sp. exhibited no effect on the growth of nitrogen-fixing bacteria. However, the addition of *Scenedesmus* sp. EPS advanced the stationary phases of MS, BJ, and SS by 6, 3, and 3 h, respectively.


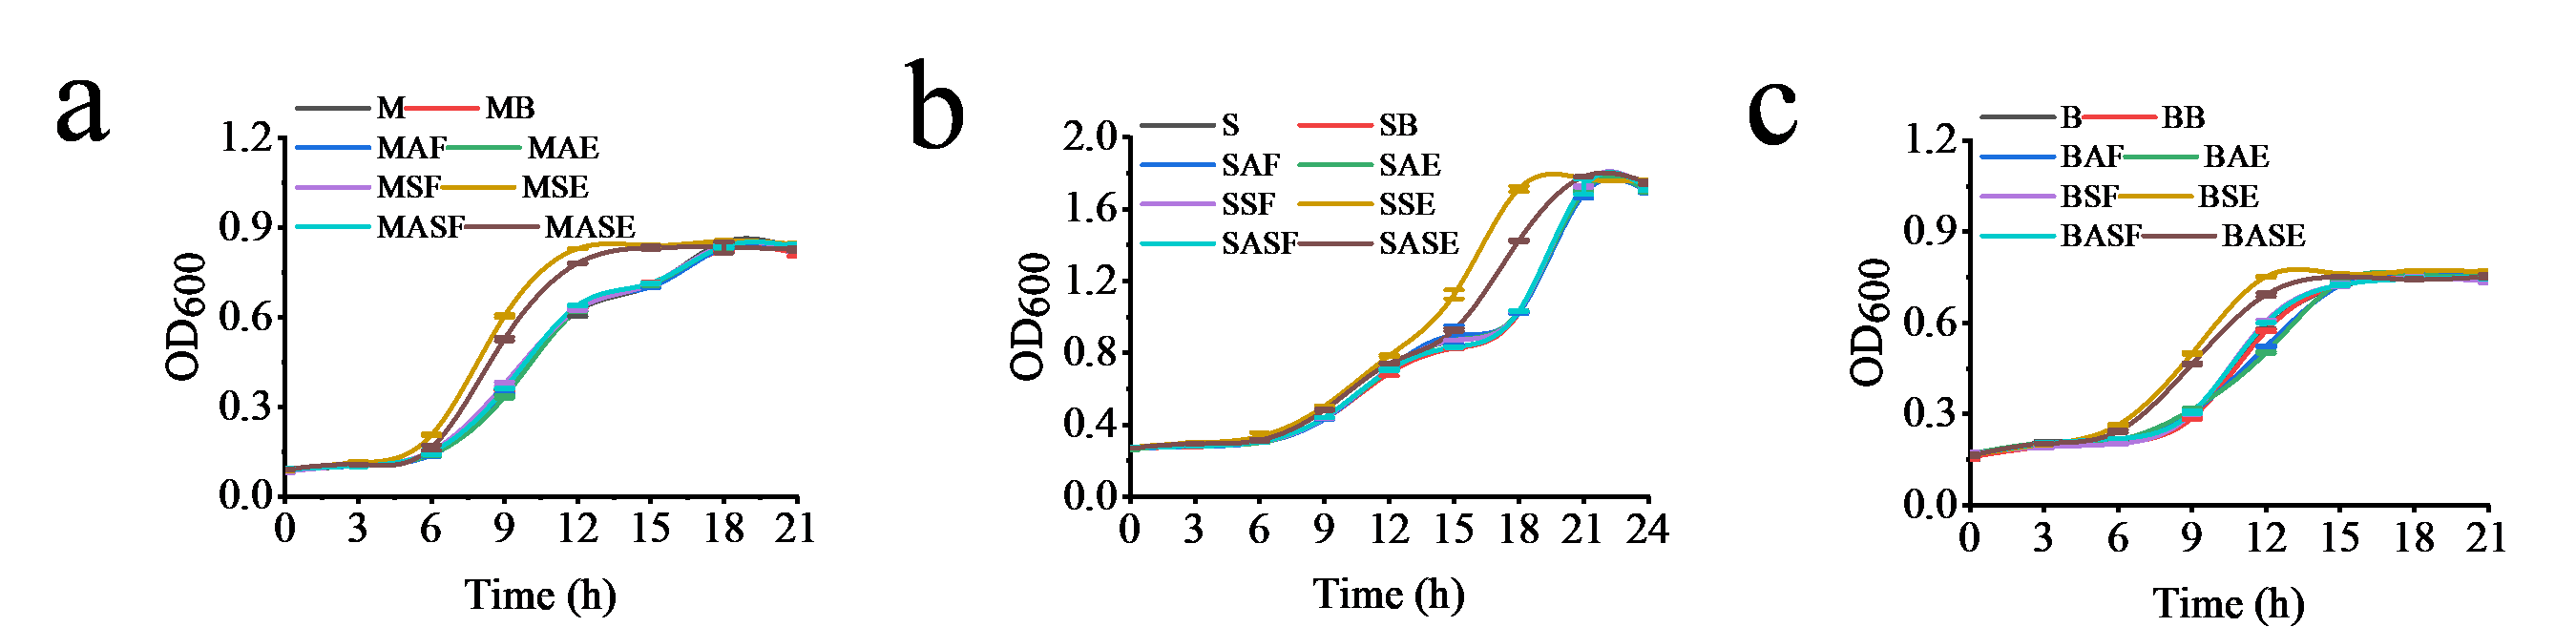


Fig. S17 Scenedesmus sp. promoted the growth of three nitrogen-fixing bacteria through the secretion of EPS. Growth curves of (a) *Methylobacterium* sp., (b) *Sphingomonas* sp., and (c) *B. japonicum* after adding EPS and filtrates of different microalgae.
